# 1 **3D atlas of the pituitary gland of the model fish medaka**

2

3

4 Muhammad Rahmad Royan<sup>1</sup>, Khadeeja Siddique<sup>1</sup>, Gergely Csucs<sup>2</sup>, Maja A. Puchades<sup>2</sup>,  
5 Rasoul Nourizadeh-Lillabadi<sup>1</sup>, Jan G. Bjaalie<sup>2</sup>, Christiaan V. Henkel<sup>1</sup>, Finn-Arne  
6 Weltzien<sup>1</sup>, Romain Fontaine<sup>1\*</sup>

7

8 <sup>1</sup> Physiology unit, Faculty of Veterinary Medicine, Norwegian University of Life Sciences,  
9 Ås, Norway

10 <sup>2</sup> Institute of Basic Medical Sciences, University of Oslo, Oslo, Norway

11

12 \*Corresponding author: [romain.fontaine@nmbu.no](mailto:romain.fontaine@nmbu.no)

13

14 Highlights:

- 15 - We offer the first 3D atlas of a teleost pituitary, which presents a valuable resource  
16 to the endocrinology and model fish community.
- 17 - The atlas reveals the 3D spatial distribution of the seven endocrine cell types and  
18 blood vessels in the juvenile/adult male and female pituitary.
- 19 - Gene expression for *tshba* and *pomca*, as well as the population size of cells  
20 expressing these genes, displays obvious sexual dimorphism in the adult medaka  
21 pituitary.
- 22 - Multi-color *in situ* hybridization and single cell RNA-seq reveal the existence of bi-  
23 hormonal cells, co-expressing *lhb-fshb*, *fshb-tshba*, *lhb-sl*, and a few multi-hormonal  
24 cells.
- 25 - An online version of the atlas is available at <https://www.nmbu.no/go/mpg-atlas>.

26

27

28

## Abstract

29 In vertebrates, the anterior pituitary plays a crucial role in regulating several essential  
30 physiological processes via the secretion of at least seven peptide hormones by different  
31 endocrine cell types. Comparative and comprehensive knowledge of the spatial distribution  
32 of those endocrine cell types is required to better understand their role during the animal life.  
33 Using medaka as the model and several combinations of multi-color fluorescence *in situ*

34 hybridization, we present the first 3D atlas revealing the gland-wide distribution of seven  
35 endocrine cell populations: lactotropes, thyrotropes, Lh and Fsh gonadotropes,  
36 somatotropes, and *pomca*-expressing cells (corticotropes and melanotropes) in the anterior  
37 pituitary of a teleost fish. By combining *in situ* hybridization and immunofluorescence  
38 techniques, we deciphered the location of corticotropes and melanotropes within the *pomca*-  
39 expressing cell population. The 3D localization approach reveals sexual dimorphism of  
40 *tshba*- and *pomca*-expressing cells in the adult medaka pituitary. Finally, we show the  
41 existence of bi-hormonal cells co-expressing *lhb-fshb*, *fshb-tshba* and *lhb-sl* using single-  
42 cell transcriptomics analysis and *in situ* hybridization. This study offers a solid basis for  
43 future comparative studies of the teleost pituitary and its developmental plasticity.

44

45 **Key words:** *in situ* hybridization, immunofluorescence, 3D, pituitary, medaka, hormone,  
46 atlas, single cell transcriptome, teleost

47

48

## 49 Introduction

50 In vertebrates, the pituitary is considered the *chef d'orchestre* of the endocrine system,  
51 regulating several essential biological and physiological functions throughout the life cycle.  
52 Located beneath the hypothalamus, it is divided into the anterior part (adenohypophysis)  
53 and posterior part (neurohypophysis). The former comprises several endocrine cell types  
54 which produce and release specific peptide hormones (1, 2), controlling many important  
55 aspects of life, including growth, stress, metabolism, homeostasis, and reproduction (3).

56 During embryogenesis, different cellular developmental trajectories specify several  
57 endocrine cell types in the adenohypophysis, characterized by the hormones they produce  
58 (4). In general, the vertebrate adenohypophysis consists of lactotropes (producing prolactin;  
59 Prl), corticotropes (adrenocorticotrophic hormone; Acth), thyrotropes (thyrotropin; Tsh),  
60 gonadotropes (follicle-stimulating and luteinizing hormone; Fsh and Lh), somatotropes  
61 (growth hormone; Gh), and melanotropes (melanocyte-stimulating hormone;  $\alpha$ -Msh), which  
62 have specific roles in regulating certain physiological functions (2, 5). Teleosts, in addition,  
63 have an endocrine cell type that is unique to these animals, i.e. somatolactotropes  
64 (somatolactin; Sl) (6). In contrast to mammals and birds, Fsh and Lh are mostly secreted by  
65 distinct endocrine cell types in teleosts (7), although both transcripts or hormones have

66 sometimes been observed in the same cells in some species (8-11). Unlike mammals, teleost  
67 endocrine cells are arranged in discrete zones. Lactotropes and corticotropes are commonly  
68 located in the *rostral pars distalis* (RPD), thyrotropes, gonadotropes, and somatotropes in  
69 the *proximal pars distalis* (PPD), and melanotropes and somatolactoropes in the *pars*  
70 *intermedia* (PI) (6, 12).

71 Over the past five decades, endocrine cell type organization in the teleost pituitary has been  
72 documented in various species. Despite having approximately similar patterns, the pituitary  
73 endocrine cell maps exhibit differences in terms of variety of cell types that are reported.  
74 For instance, the localization of endocrine cell populations in dorado fish shows only four  
75 distinct types of endocrine cells across the adenohypophysis (13). By contrast, the other  
76 studies describe five (Japanese medaka (14)), six (fourspine sculpin, (15); cardinal and  
77 bloodfin tetra (16)), seven (greater weever fish, (17); white seabream, (18); dimerus cichlid  
78 (19)), and eight (Atlantic halibut, (20); Nile tilapia, (21); saddle wrasse, (22)) cell types.

79 Even though these previous studies have provided interesting information on the spatial  
80 organization of endocrine cell populations, they lack information due to the techniques  
81 available and used at the time. First, the use of mid- and para-sagittal sections of the pituitary  
82 to reconstruct organizational patterns of endocrine cells leads to a lack of information on the  
83 lateral sides. Second, the single-labeling method and non-species specific antibodies that are  
84 typically used do not provide sufficient detail on arrangements among adjacent endocrine  
85 cell populations, or on the possible existence of multi-hormonal cells as described in  
86 mammals (23-26). These features will be important to better understand the underlying  
87 processes in fish physiology and endocrinology. Moreover, the distribution of the blood  
88 vessels within the pituitary, which play an essential role by transporting the released  
89 hormones, is poorly known. A better knowledge will help understand how endocrine cells  
90 arranged within a vascularized system that is thought to facilitate paracrine signaling in the  
91 pituitary (27). Also, since it has been shown that the pituitary is a plastic organ with changes  
92 occurring at cellular and population levels (28), it is essential to describe the cell  
93 composition, spatial organization, and vascularization of the pituitary in detail.

94 The Japanese medaka (*Oryzias latipes*) is a teleost model commonly used to investigate  
95 vertebrate and teleost physiology, genetics, and development, due to easy access to a wide  
96 range of genetic and molecular techniques (29, 30). We have recently used single-cell RNA  
97 sequencing to describe seven distinct endocrine cell types (expressing *prl*, *pomca*, *fshb*, *lhb*,

98 *tshba*, *gh*, and *sl*) in the medaka pituitary (31). Here, we extend this study by describing  
99 differences present in the spatial distribution of the seven endocrine cell populations, in  
100 juvenile and adult fish from both sexes. Using multi-color *in situ* hybridization techniques  
101 together with single-cell transcriptomics analysis, this study offers the first 3D atlas of  
102 teleost pituitary endocrine cell populations, allowing the identification of differences in  
103 spatial distribution patterns between sexes and stages, as well as the existence of multi-  
104 hormonal cells.

105

## 106 **Materials and Methods**

### 107 **Experimental animals**

108 Juvenile (2-month old) and adult (6-month old) wild type medaka (WT, d-rR strain) were  
109 reared at 28 °C in a re-circulating water system (pH 7.5; 800 µS) with 14 hours light and 10  
110 hours dark conditions. Fish were fed three times daily using artemia and artificial feed. Sex  
111 determination was based on secondary sexual characteristics (32). Experiments were  
112 conducted in accordance with recommendations on experimental animal welfare at the  
113 Norwegian University of Life Sciences.

114

### 115 **Quantitative Polymerase Chain Reaction (qPCR)**

116 RNA extraction from pituitaries (n = 7) was performed as previously described in (33). Fish  
117 were euthanized by immersion in ice water and pituitaries were collected and stored at -80  
118 °C in 300 µl of TRIzol® (Invitrogen, Carlsbad, USA) with 6 zirconium oxide beads (Bertin  
119 Technologies, Versailles, France; diameter 1.4 µm). Later, tissues were homogenized and  
120 mixed with 120 µl chloroform. The pellet was reconstituted with 14 µl of nuclease free  
121 water. Due to the size of the tissue, 3 juvenile pituitaries were pooled to represent one  
122 replicate of each sample. A total of 33 ng of RNA was used to synthesize cDNA using  
123 SuperScript III Reverse Transcriptase (Invitrogen, Carlsbad, CA, USA) and random  
124 hexamer primers (ThermoFisher scientific). 5× diluted cDNA samples were analyzed in  
125 duplicate, using 3 µL of the cDNA and 5 µM each of forward and reverse primer in a total  
126 volume of 10 µL (**Table 1**). The parameter cycle was 10 min pre-incubation at 95 °C,  
127 followed by 42 cycles of 95 °C for 10 s, 60 °C for 10 s and 72 °C for 6 s, followed by melting  
128 curve analysis to assess PCR product specificity. The mRNA level was normalized using

129 *rpl7* as reference gene as it was found no significant difference of expression between  
130 groups.

131

### 132 **Multi-color fluorescence *in situ* hybridization (Multi-color FISH)**

133 **Tissue preparation:** Fish were euthanized by immersion in ice water. Brain and pituitary  
134 were taken and fixated overnight at 4 °C in 4% paraformaldehyde (PFA, Electron  
135 Microscopy Sciences, Hatfield, Pennsylvania) diluted with phosphate buffered saline with  
136 Tween (PBST: PBS, 0.1%; Tween-20), approximately 50× the tissue volume. Tissue was  
137 then dehydrated using a series of increasing ethanol concentrations: 25%, 50%, 75%, 96%  
138 followed by a storage in 100% methanol at -20 °C until use.

139 **Cloning and RNA probe synthesis:** DNA sequences for the probes were obtained from  
140 NCBI as listed in **Table 2**. Sequences are selected according to the high expression in the  
141 pituitary for those having more than one paralog in the medaka genome (*tshb* and *pomc*).  
142 PCR primers for the amplification of the probe genes were designed from transcribed  
143 sequences (mRNA) for each gene using Primer3 (<https://primer3.ut.ee/>). Following RNA  
144 extraction and cDNA synthesis as described above, cDNA was used to amplify the sequence  
145 of interest by PCR using Taq DNA polymerase (Thermo Fisher Scientific) with a 3-min  
146 denaturation step at 94 °C, followed by 35 cycles at 94 °C for 15s, 50 °C for 15s, and 72 °C  
147 for 60s, and finally 1 cycle of 72 °C for 5 mins. The amplified PCR products were isolated  
148 using a gel extraction kit (Qiagen) and cloned into the pGEM-T Easy vector (Promega)  
149 following manufacturer instructions and verified by sequencing. PCR products from the  
150 verified plasmids were used as template to synthesize sense and anti-sense complementary  
151 RNA probes using *in vitro* transcription with T7 or SP6 RNA polymerase (Promega,  
152 Madison, Wisconsin). RNA probes were tagged with dinitrophenol-11-UTP (DNP, Perkin  
153 Elmer, Waltham, Massachusetts), fluorescein-12-UTP (FITC, Roche Diagnostics), or  
154 digoxigenin-11-UTP (DIG, Roche Diagnostics). Finally, the probes were purified using the  
155 Nucleospin RNA clean-up kit (Macherey-Nagel, Hoerd, France) and the concentration was  
156 measured using the Epoch Spectrophotometer System (BioTek, Winooski, VT, USA).

157 **Multi-color fluorescence *in situ* hybridization (FISH):** Multi-color FISH was performed  
158 as previously described in (34) with minor modifications. Tissues were serially rehydrated,  
159 and the pituitary was detached from the brain. Afterwards, whole pituitaries were hybridized  
160 with the probes (0.11 – 3.17 ng/μl) for 18 hours at 55 °C, and incubated with different

161 combinations of anti-DNP- (Perkin Elmer), anti-FITC-, and anti-DIG-conjugated antibodies  
162 (Roche Diagnostics), followed by TAMRA- (Thermofisher), Cy5- (Perkin Elmer) and  
163 FITC-conjugated tyramides (Sigma). The nuclei were stained with DAPI (1:1000, 4', 6-  
164 diamidino-2-phenylindole dihydrochloride; Sigma). The absence of labeling when using  
165 sense probes was used to confirm the specificity of the anti-sense probes. Whole pituitaries  
166 were mounted using Vectashield H-1000 Mounting Medium (Vector, Eurobio/Abcys)  
167 between microscope slides and cover slips (Menzel Glässer, VWR) with spacers  
168 (Reinforcement rings, Herma) in between for the juveniles, and between two cover slips  
169 with spacers for adults.

170

### 171 **Combined FISH and Immunofluorescence (IF)**

172 To distinguish the localization of adrenocorticotrophic releasing hormone (Acth) and alpha-  
173 melanocyte stimulating hormone ( $\alpha$ -Msh) cells within *pomca*-expressing cells separately, IF  
174 was performed using the antibodies shown in **Table 3**. After FISH for *pomca* labelled with  
175 FITC-conjugated tyramide, the pituitaries were embedded in 3% agarose (H<sub>2</sub>O) and para-  
176 sagittally sectioned with 60  $\mu$ m thickness using a vibratome (Leica). From a single pituitary,  
177 odd and even ordered slices were processed to detect Acth and  $\alpha$ -Msh IF, respectively.  
178 Tissue slices were incubated for 10 minutes at room temperature (RT) in permeabilizing  
179 buffer (0.3 % Triton in PBST) with agitation, before incubation for 1 hour at RT in blocking  
180 solution (Acth: 3% normal goat serum (NGS); 0.3% Triton; 1% dimethylsulfoxide (DMSO)  
181 in PBST;  $\alpha$ -Msh: 3% NGS; 5% Triton; 7% DMSO in PBST). Sections were then incubated  
182 at 4 °C overnight with primary antibodies (diluted in blocking) or without (control), followed  
183 by 4 hours at RT with secondary antibodies (diluted in blocking) with extensive PBST  
184 washes in between. Nuclei were stained with DAPI (1/1000). Controls were performed as  
185 described above incubating the tissue without the primary antibodies and confirming the  
186 absence of fluorescent signals. The antibody dilution is provided in **Table 3**.

187

### 188 **Blood vessel staining**

189 Blood vessels were stained by cardiac perfusion as previously described in (35). The fish  
190 were anesthetized with 0.04% Tricaine (pH 7), and the anterior abdomen was cut to let the  
191 heart opening adequately wide for the injection. Afterwards, 0.05% of DiI (1,1'-Dioctadecyl-  
192 3,3,3',3'-Tetramethylindocarbocyanine Perchlorate; Invitrogen) solution diluted in 4% PFA  
193 (in PBS) was administered to the *bulbus arteriosus* through the ventricle using a glass

194 needle. The pituitary was dissected and fixated in 4% PFA (in PBS) for 2 hours in the dark  
195 before being washed 2 times with PBS and mounted as described above.

196

### 197 **Image processing and analysis**

198 Fluorescent images were obtained using an LSM710 Confocal Microscope (Zeiss, Leica)  
199 with 25× (for adult pituitary) and 40× (for juvenile pituitary) objectives. Filters with  
200 wavelength of 405 (DAPI), 555 (TAMRA; Alexa-555), 633 (Cy5) and 488 (FITC; Alexa-  
201 488) nm were used. Due to the size of the adult pituitaries, the image acquisition was done  
202 from the dorsal and ventral sides of the pituitary with some overlaps in the middle. In  
203 conjunction with the microscope, ZEN software (v2009, Zeiss) was used to process the  
204 images, and ImageJ (1.52p; <http://rsbweb.nih.gov/ij/>) was used for processing z-projections  
205 from confocal image stacks. The dorsal and ventral stacks of adult pituitaries were aligned  
206 using HWada (<https://signaling.riken.jp/en/en-tools/imagej/635/>) and StackReg plugin  
207 (<http://bigwww.epfl.ch/thevenaz/stackreg/>), before presenting them in orthogonal views.

208

### 209 **3D atlasing**

210 While juvenile pituitaries were imaged as one block, adult pituitaries were imaged from the  
211 ventral and dorsal side with confocal imaging as described above. The two sides of the adult  
212 pituitaries were then merged using landmarks as visible with the DAPI staining. Finally,  
213 eight pituitaries labeled for different markers were aligned to the same coordinate system  
214 also using manually selected landmarks. These data were used for the creation of four 3D  
215 atlases of the pituitary gland, using the principle approaches outlined in (36).

216 The creation of the 3D atlases involved several steps. Merging and alignment was done using  
217 LandmarkReg (<https://github.com/Tevemadar/LandmarkReg>, with accompanying utilities  
218 <https://github.com/Tevemadar/LandmarkReg-utils>). Image stacks were saved in NIfTI  
219 format (<https://imagej.nih.gov/ij/plugins/nifti.html>) and converted with the  
220 "NifTI2TopCubes" utility before the matching anatomical positions ("landmarks") were  
221 manually identified in volume-pairs. Both the signal from endocrine cells and the DAPI  
222 background were inspected, and four or more landmarks were recorded for each volume-  
223 pair. In case of ventral-dorsal half images (adult samples), a custom utility "PituBuild" was  
224 used for merging the two halves, based on partial overlap. Finally, each set of complete  
225 pituitary volumes was aligned to a common anatomical space using the "Match" utility. The  
226 resulting NIfTI volumes were then converted to TIFF stacks for viewing and analysis.

227 To enable 3D viewing of the pituitary atlases, data were prepared for the MeshView tool  
228 (RRID:SCR\_017222, <https://www.nitrc.org/projects/meshview/>) developed for 3D brain  
229 atlas viewing (37). Volumes were first binarized using the "BinX" utility with a threshold  
230 value of 50. MeshGen (<https://www.nitrc.org/projects/meshgen/>) was then used to generate  
231 surface meshes in standard STL format (<http://paulbourke.net/dataformats/stl/>) before  
232 conversion using PackSTL (<https://github.com/Teveadar/MeshView-PackSTL>) to allow  
233 viewing in MeshView.

234

### 235 **Single cell transcriptomics analysis (scRNA-seq)**

236 We used processed scRNA-seq dataset for male and female pituitaries (31) and filtered out  
237 red blood cells to avoid noise. Next, we applied a cut-off to differentiate between cells with  
238 high and low expression for specific genes (Supp. Fig. 1). This dataset is further used to  
239 generate the pair-wise scatterplots using the R package ggplot2 (version 2\_3.3.2), to show  
240 cells expressing more than one hormone-producing gene. Finally, we got 191 and 229  
241 multiple hormone-producing cells in female and male pituitaries, respectively. We generated  
242 clustered heatmaps using pheatmap (version 1.0.12) to visualize the expression levels of  
243 hormone-producing genes in each cell expressing multiple hormones.

244

### 245 **Statistical analysis**

246 Levene's test was performed to analyze the homogeneity of variance while the normality  
247 was tested using the Saphiro-Wilk Normality test. The differences in mRNA levels were  
248 evaluated using One-way ANOVA followed by Tukey *post hoc* test. The data are shown as  
249 mean + SEM (Standard Error of Mean) unless otherwise stated in the figure legend.  $p < 0.05$   
250 was used as a threshold for statistical significance.

251

### 252 **Data availability**

253 All image files are available in a data repository (link coming soon). The 3D atlases (Fig. 1)  
254 can be found on a webpage containing explanatory videos and other types of data completing  
255 the online pituitary atlas (<https://www.nmbu.no/go/mpg-atlas>), allowing easy access and  
256 navigation through the data.

257



## 258 **Results**

### 259 **3D atlases of the medaka pituitary**

260 Using several combinations of multi-color FISH, we combined the labeling to form four 3D  
261 pituitary atlases now available online (<http://meshview.uiocloud.no/Medaka-pituitary/?JF>;  
262 <http://meshview.uiocloud.no/Medaka-pituitary/?JM>; [http://meshview.uiocloud.no/Medaka-](http://meshview.uiocloud.no/Medaka-pituitary/?AF)  
263 [pituitary/?AF](http://meshview.uiocloud.no/Medaka-pituitary/?AF); <http://meshview.uiocloud.no/Medaka-pituitary/?AM>), allowing us to  
264 precisely localize the seven endocrine cell types (*prl*, *pomca*, *tshba*, *fshb*, *lhb*, *gh* and *sl*) in  
265 the adenohypophysis of medaka.

266

#### 267 **1. *prl*-expressing cells (lactotropes)**

268 In both adults and juveniles (Supp. Fig. 2), *prl*-expressing cells make up almost the entirety  
269 of the RPD from the dorsal to the ventral side of the pituitary, without any obvious difference  
270 in localization pattern between males and females. They border on and intermingle with a  
271 *pomca*-expressing cell population (Supp. Fig. 9). In some fish, a few *prl*-expressing cells are  
272 also localized peripherally in the dorsal area of PPD (data not shown).

273

#### 274 **2. *pomca*-expressing cells (corticotropes and melanotropes)**

275 *pomca*-expressing cells are observed in two distinct places in the pituitary. One population  
276 is localized in the dorsal part of RPD, where it is mostly clustered in the middle if observed  
277 from transverse point of view, and the second is detected in the PI area (Supp. Fig. 3). While  
278 the first one is adjacent to and mixing with *prl*-expressing cells, in close proximity to *tshba*-  
279 expressing cells (Supp. Fig. 9), the second population intermingles with *sl*-expressing cells  
280 (Supp. Fig. 10).

281

#### 282 **3. *tshba*-expressing cells (thyrotropes)**

283 *tshba*-expressing cells are localized in the dorsal side of anterior PPD towards the PN, next  
284 to the *prl*- and *pomca*-expressing cells (Supp. Fig. 4 and Supp. Fig. 9). From a transverse  
285 point of view, *tshb*-expressing cells are mostly concentrated in the middle part of the PPD  
286 (Supp. Fig. 4) where they border and mix with *fshb*-expressing cells (Supp. Fig. 11).

287

#### 288 **4. *fshb*-expressing cells (gonadotropes)**

289 *fshb*-expressing cells are detected from the anterior to middle part of the PPD, distributed in  
290 both lateral sides of the pituitary from a transverse point of view (Supp. Fig. 5). These cells

291 cover the PN from a frontal point of view (Supp. Fig. 5). They border and mix with *tshba*-  
292 expressing cells in the dorsal (Supp. Fig. 11), *lhb*-expressing cells in the ventral (Supp. Fig.  
293 12) and *gh*-expressing cells in the posterior part of the PPD (Supp. Fig. 13).

294

#### 295 **5. *lhb*-expressing cells (gonadotropes)**

296 In both juveniles and adults, *lhb*-expressing cells are commonly distributed in the peripheral  
297 area of the PPD, covering almost the entire ventral side of the pituitary (Supp. Fig. 6). In  
298 adults, *lhb*-expressing cells are also localized in the proximity of peripheral area of the PI  
299 (Supp. Fig. 6). These cells border and mix with *fshb*-expressing cells in the PPD (Supp. Fig.  
300 12), and with *pomca*- and *sl*-expressing cells in the PI of adult pituitary (Supp. Fig. 10).

301

#### 302 **6. *gh*-expressing cells (somatotropes)**

303 *gh*-expressing cells are localized on the dorsal side of the PPD towards the PN area (Supp.  
304 Fig. 7). Similar to *fshb*-expressing cells, which are distributed to both lateral sides of the  
305 pituitary, *gh*-expressing cells are more towards the posterior part of the PPD, encompassing  
306 and bordering with the PN (Supp. Fig. 7), mixing with *fshb*-expressing cells (Supp. Fig. 13).

307

#### 308 **7. *sl*-expressing cells (somatolactotropes)**

309 *sl*-expressing cells are intermingled within *pomca*-expressing cells located in the PI (Supp.  
310 Fig. 8 and Supp. Fig. 10). In the adult pituitary, these cells border and mix with *lhb*-  
311 expressing cells that are detected in the proximity of the PI (Supp. Fig. 10).

312

#### 313 **8. Distinction of Acth and $\alpha$ -Msh cell populations**

314 The combination of FISH for *pomca* with IF for Acth or  $\alpha$ -Msh shows that that Acth cells  
315 overlap the entire *pomca* signal, while melanotropes overlap *pomca* signals that are located  
316 in the PI, both in adults (Fig. 2) and in juvenile pituitaries (Supp. Fig. 14).

317

#### 318 **9. Blood vessels**

319 3D reconstruction shows that blood vessels encompass the entire adenohypophysis, without  
320 any obvious difference observed between sexes and stages (Fig. 3).

321

## 322 Sex and stage differences

323 FISH and qPCR data did not reveal any difference in *prl*- and *gh*-expressing cell number or  
324 mRNA levels between sexes and stages. In contrast, adult females show significantly higher  
325 mRNA levels in both *fshb* ( $p < 0.01$ ) and *lhb* ( $p < 0.0001$ ) compared to the other groups,  
326 while *lhb* mRNA levels are significantly higher in adult males than in juveniles ( $p < 0.05$ )  
327 (Fig. 4), despite no obvious difference in the cell population size (Supp. Fig. 4-5). *sl* mRNA  
328 levels are significantly higher in juveniles compared to adult males ( $p < 0.05$ ) (Fig. 4)  
329 without any obvious difference in cell number (Supp. Fig. 8).

330 In contrast, FISH revealed that the population of *tshba*-expressing cells is larger in adult  
331 females, expanding from the anterior to the middle part of PPD, whereas in adult males and  
332 juveniles they are found only in the anterior part of the PPD (Supp. Fig. 4). This agrees with  
333 the significantly higher *tshba* mRNA levels observed by qPCR in the adult female group  
334 compared to the other groups ( $p < 0.0001$ ) (Fig. 4). The *tshba*-expressing cell population  
335 also appears larger in juveniles than in adult males using FISH, in line with significantly  
336 higher level of *tshba* mRNA observed by qPCR in juveniles compared to in adult males ( $p$   
337  $< 0.05$ ) (Fig. 4 and Supp. Fig. 4).

338 *pomca* mRNA levels in adult male are significantly higher than the other groups ( $p <$   
339  $0.0001$ ), and this agrees with the *pomca*-expressing cell population illustrated in Fig. 2,  
340 Supp. Fig. 3 and Supp. Fig. 14, where there are bigger populations of *pomca* cells in adult  
341 male than the other groups.

342 Despite obvious differences in mRNA transcript levels and cell number observed with qPCR  
343 and FISH/IF labeling, we could not observe any difference in the proportion of each cell  
344 type between males and females with the scRNA-seq data.

345

## 346 Cells producing multiple hormones

347 Using scRNA-seq data, we observed some bi-hormonal cells in the pituitary of adult medaka  
348 (Fig. 5). Both sexes show a number of cells co-expressing *lhb*- and *fshb*-, *lhb*- and *tshba*-  
349 and *fshb* and *tshba*. Meanwhile, some cells co-expressing *lhb* and *sl*, *fshb* and *sl*, *fshb* and  
350 *prl*, *fshb* and *pomca*, *tshba* and *prl*, *tshba* and *pomca*, *prl* and *gh*, and *prl* and *pomca* are  
351 unique to adult males, whereas co-expression of *fshb*- and *gh*-expressing cells is only found  
352 in adult females (Fig. 5A). The co-expression between *lhb-fshb* and *fshb-tshba* in both sexes  
353 and *lhb-sl* in adult male was confirmed using multi-color FISH (Fig. 6). While the co-

354 localization of cells expressing *lhb-fshb* and *fshb-tshba* was observed in several individuals,  
355 the *lhb-sl* expressing cells were observed only in 1 out of 13 adult male pituitaries analyzed.

356 Several cells also co-express more than two hormone-encoding genes, although these are  
357 rare compared with bi-hormonal cells (Fig. 5B), and in this study they could not be  
358 confirmed using multi-color FISH.

359

## 360 **Discussion**

### 361 **3D spatial distribution of endocrine cell populations and blood vessels**

362 We have recently used scRNA-seq to identify and characterize seven endocrine cell types  
363 in the teleost model organism medaka (31). Although a 3D atlas of the pituitary gland  
364 development has been previously described in zebrafish (38), the present atlas is the first 3D  
365 atlas of all pituitary endocrine cell populations in a teleost fish. It provides more precise and  
366 detailed information on the distribution and organization of the different cell types, and  
367 clearly demonstrate that endocrine cells are distributed differently when comparing mid-  
368 sagittal with para-sagittal sections (Fig. 7).

369 As reported in coho (39) and chum salmon (40, 41), seabass (42), gilt-head seabream (43),  
370 common barbel (44) and striped bass (45), we observed some lactotropes in the ventro-  
371 peripheral area of the PPD. However, these cells were found only in some fish and not  
372 always at the same location, which makes them difficult to map. We found Lh gonadotropes  
373 in the PI, in addition to in the PPD, but only in adults, and we did not observe Lh cells in  
374 RPD as reported by some studies (16, 17, 46-48). The extra-PPD localization of Lh  
375 gonadotropes might be due to PPD extension (20) or Lh cell migration to other zones during  
376 the ontogeny of the adenohypophysis (49). Meanwhile, several studies reported  
377 somatotropes in the RPD (45, 50) and PI (51, 52), and somatolactotropes and melanotropes  
378 in the PPD (13, 16-18, 51). However, we did not observe this in medaka. The wide  
379 localization of Gh, Sl, and  $\alpha$ -Msh cells in these studies might also be explained by antigenic  
380 similarities as suggested in (13, 16, 53).

381 The blood vasculature is ubiquitously spread over almost the entire adenohypophysis in  
382 medaka, without obvious differences between sexes and stages. This agrees with previous  
383 studies in zebrafish (54, 55) showing a highly vascularized pituitary. Such complex  
384 vasculature is, of course, central to the endocrinological function of the pituitary, as it allows

385 for the efficient transport of secreted hormones to peripheral organs. In addition, it may  
386 facilitate intra-pituitary paracrine signaling (27).

387

### 388 **Sexual dimorphism of *tshba*- and *pomca*-expressing cell populations**

389 While it seems impossible to show differences of endocrine cell population between sexes  
390 and stages when the data only rely on para-sagittal sections of the pituitary, whole pituitary  
391 labeling methods allow their identification. For instance, we show for the first time that  
392 *tshba*- and *pomca*-expressing cell populations are more numerous in adult females and  
393 males, respectively. Our qPCR data on *tshba* and *pomca* levels agree with previous studies  
394 in medaka (56) and further support the sexual dimorphism. In the previous medaka study,  
395 androgens were suggested to be involved in *tshb* suppression in adult males via activation  
396 of *tph1* transcription expressed in *pomc*-expressing cells. This is important for serotonin  
397 synthesis, which plays a role in repressing the expression of some endocrine cell markers,  
398 including *tshb*. We also found significantly lower *tshba* levels in adult compared to in  
399 juvenile males where the androgen levels are generally lower (for review, see (57, 58)),  
400 supporting the inhibitory role of androgens on *tshba* levels. It will be interesting to challenge  
401 this hypothesis in future research using orchidectomy which allows for androgen clearance  
402 in the medaka (59). However, although higher *tshb* levels are also observed in female half-  
403 barred wrasse (60) and *tshb* levels are higher in juvenile than in adult male Atlantic salmon  
404 (61), zebrafish shows no sexual dimorphism of *tshb* and *pomc* (62), suggesting species  
405 differences.

406 We also observed sexual dimorphism of *fshb* and *lhb* mRNA levels in adults, in agreement  
407 with a previous medaka study (56). This suggests a difference in gonadotrope cell activity  
408 as we did not observe a difference in population size, also supported by the absence of  
409 significant differences in Lh or Fsh cell numbers in previous studies (9, 63). In contrast, we  
410 observed an increase of *lhb* mRNA levels between juvenile and adult stages, which might  
411 mainly be due to an increase in cell numbers as shown in (63). Surprisingly, we did not  
412 observe a significant difference in *fshb* mRNA levels between juveniles and adults, while an  
413 increase in Fsh cell numbers has also been reported during sexual maturation (9). While  
414 neither sexual dimorphism nor stage differences were observed in *prl* or *gh* levels, we found  
415 stage difference in *sl* levels, with higher levels in juveniles than in adults. Somatolactin has  
416 been associated with sexual maturation in some teleosts, such as coho salmon (64), Nile  
417 tilapia (65) and flathead grey mullet (66). The upregulation of *sl* levels in teleosts is thought

418 to be related to gonadal growth, as it is highly expressed at the onset of gonadal growth and  
419 lowly expressed post-ovulation (67, 68). This implies that in the current study, the adult fish  
420 used might be in a post-ovulation phase while the juveniles appear to enter gonadal  
421 development.

422

### 423 **scRNA-seq and multi-color FISH reveal the presence of multi-hormonal cells** 424 **in the adult medaka pituitary**

425 The presence of cells expressing more than one hormone in the anterior pituitary has been  
426 shown in many studies, both in teleosts and in mammals (for review see (28, 69-71)). Using  
427 scRNA-seq technology, multi-hormonal cells have for instance been described in the mouse  
428 pituitary (72). However, using similar approaches, pituitary multi-hormonal cells have not  
429 been reported in teleosts (31, 73), although some studies have documented cells producing  
430 more than one hormone in the teleost pituitary (8-11).

431 Here, we show the presence of gonadotrope cells expressing both *lhb* and *fshb* which has  
432 previously been reported in medaka (9) and in other teleost species (8, 10, 11). One proposed  
433 underlying mechanism that could explain the existence of such bi-hormonal gonadotropes  
434 is their capacity to change phenotype, with a transitory bi-hormonal state as suggested by *in*  
435 *vitro* observation where Lh cells were found to become Fsh (9). We also found cells co-  
436 expressing *fshb-tshba* and *sl-lhb*. Although previous immunohistochemistry studies on the  
437 pituitary of several teleost species showed cross-reaction between Tsh and Lh/Fsh (43, 53)  
438 and between Lh and Sl antibodies (16, 53, 74, 75), we show specific labeling of *tshb*, *fshb*,  
439 *lhb*, and *sl* in the current study confirming the specificity of the probes. Therefore, the  
440 observation of colocalization of *fshb-tshba* and *sl-lhb* supports that these bi-hormonal cells  
441 exist in the medaka pituitary. Meanwhile, a number of studies have shown co-staining  
442 between Prl, Gh and Sl (13, 20, 22, 40, 51). However, our scRNA-seq data exhibit only a  
443 few cells co-expressing *prl* and *gh*. While antigenic similarities could be the reason of co-  
444 staining between these cell types (13, 16, 53), their low occurrence in the medaka pituitary  
445 might be the reason of being unable to observe them with FISH.

446 Within the *pomca*-expressing cell population, we observed Acth staining alone at the border  
447 of the RPD/PPD and staining of both Acth and  $\alpha$ -Msh in the PI. Co-staining between Acth  
448 and  $\alpha$ -Msh is not uncommon as Acth-immunoreactive cells have been found in RPD and PI  
449 areas in other teleost species (8, 18, 20-22, 42, 43, 76). However, it must be noted that the  
450 target antigen of anti-Acth used in this study and most previous studies contains the target

451 antigen for anti- $\alpha$ -Msh ([https://www.uniprot.org/uniprot/P01189#PRO\\_0000024970](https://www.uniprot.org/uniprot/P01189#PRO_0000024970)). This  
452 might explain why we found both Acth and  $\alpha$ -Msh cells in the PI. A previous study pre-  
453 incubating anti-Acth with  $\alpha$ -Msh antigen demonstrated that Acth cells are localized in the  
454 RPD while  $\alpha$ -Msh cells are found in the PI (21). This might also be the case in medaka.

455 We also show that a few cells in the adult medaka pituitary express more than two hormone-  
456 encoding genes. Despite having been reported in mammals (72), the current study is the first  
457 to show the presence of such multi-hormonal cells in the teleost pituitary. Although we could  
458 not confirm their existence using FISH, most likely because of the low number of such cells  
459 present in the pituitary, the demonstration of their existence using scRNA-seq raises  
460 questions about their origin and roles in the medaka pituitary.

461 Finally, the 3D atlas platform that is provided online will help research community to take  
462 a close look on the spatial distribution of endocrine cells and the vascularization of blood  
463 vessels in the pituitary.

464

#### 465 **Author Contributions**

466 RF and FAW conceptualized and planned the work. RF, MAP, JB and FAW obtained  
467 funding. NR did all cloning. MRR and RF performed the experiments and acquired the  
468 imaging data. MRR and GC processed the imaging data and developed the online 3D model,  
469 supervised by MAP and JB. CH and KS analyzed the single cell transcriptome data. MRR,  
470 CH and RF wrote the paper with the inputs from all authors.

471

#### 472 **Funding**

473 This study was funded by the Norwegian University of Life Sciences (to RF) and the  
474 Norwegian Research Council grants No. 251307, 255601, and 248828 (to FAW). The tools  
475 development received support from the European Union's Horizon 2020 Framework  
476 Programme for Research and Innovation under the Specific Grant Agreement No. 945539  
477 (Human Brain Project SGA3) (to JGB) and the Research Council of Norway under Grant  
478 Agreement No. 269774 (INCF Norwegian Node) (to JGB).

479

## 480 **Conflict of Interest**

481 The authors declare that the research was conducted in the absence of any commercial or  
482 financial relationships that could be construed as a potential conflict of interest.

483

## 484 **Acknowledgments**

485 The authors thank Ms Lourdes Carreon G. Tan for her assistance in the fish husbandry.

486

## 487 **Figure Legends**

488 **Figure 1.** 3D reconstruction of medaka anterior pituitary containing seven endocrine cell  
489 populations. Illustration of brain and pituitary (pointed by black arrow) of medaka from  
490 lateral view (A) and ventral view (B) (Figure is adopted and modified with permission from  
491 (63)). The navigation platform of 3D spatial distribution endocrine cell population that are  
492 now available online (C). Snapshots of 3D reconstruction of endocrine cell population from  
493 juvenile and adult medaka male and female (D). The snapshots were captured from different  
494 perspectives: free viewpoint (i), lateral (ii and iii), dorsal (iv) and ventral (iv). Four direction  
495 arrows display the direction of the pituitary (A: anterior; P: posterior; D: dorsal; V: ventral).  
496 The color legend shows the color code for each cell type.

497 **Figure 2.** The combination of FISH for *pomca* and IF for Acth or  $\alpha$ -Msh allows the  
498 distinction of two clear *pomca* expressing cell populations. The distinction of Acth (green)  
499 and  $\alpha$ -Msh (blue) producing cells from *pomca*-labelled (red) in the pituitary from adult male  
500 and female medaka. Dashed line represents the pituitary as shown in the right panel. Four  
501 direction arrows display the direction of the pituitary (A: anterior; P: posterior; D: dorsal;  
502 V: ventral).

503 **Figure 3.** 3D projection of blood vessels from juvenile and adult male and female medaka  
504 pituitary from the dorsal side. Left right arrow symbol shows the direction of the pituitary  
505 (A: anterior; P: posterior).

506 **Figure 4.** Relative mRNA levels of endocrine cell markers (*prl*, *tshba*, *fshb*, *lhb*, *gh*, *sl* and  
507 *pomca*) in juvenile and adult medaka males and females (juvenile male, JM; juvenile female,  
508 JF; adult male, AM; adult female, AF). Graphs are provided as mean + SEM, and jitter dots



509 represent N. Different letters display statistical differences ( $p < 0.05$ ) between groups as  
510 evaluated by One-way ANOVA followed by Tukey *post hoc* test.

511 **Figure 5.** scRNA-seq data reveal the presence of bi-hormonal and multi-hormonal cells in  
512 the medaka pituitary. Pair wise plots of 2228 cells in female and 3245 cells in male pituitary  
513 (A). Colored by filtered cells (gray), *lhb* expressing cells (green), *fshb* expressing cells  
514 (darkolivegreen), *tshba* expressing cells (cyan), *sl* expressing cells (red), *prl* expressing cells  
515 (blue), *gh* expressing cells (magenta), *pomca* expressing cells (darkgrey) and cells  
516 expressing more than one endocrine gene (purple). Light grey cells represent the cells where  
517 gene expression for the investigated hormone is considered as part of the background. Axes  
518 are log normalized. Heatmap of seven hormone-encoding genes of the female and male  
519 pituitary (B). Each row represents one cell, and left side indicates cell clustering. Low  
520 expressions are shown in blue and high expressions are shown in red. Color bars on the  
521 left indicates how different cell types clustered on the basis of expression in each cell. Black  
522 arrows show cells that strongly express more than two hormone-encoding genes.

523 **Figure 6.** Multi-color FISH reveals some cells co-expressing more than one hormone-  
524 encoding genes in the medaka pituitary. Confocal plane confirming colocalization of *lhb*  
525 and *fshb* labelings (A), and *fshb* and *tshb* (B) labelings in both male and female adult medaka  
526 pituitary. Confocal plane showing the colocalization of *lhb* and *sl* in adult male (C). White  
527 arrows show cells whose mRNAs are co-expressed, while yellow arrows show cells that do  
528 not (can be used as control of probe's specificity). The location of the bi-hormonal cells is  
529 in the proximity of red rectangle as illustrated in the schematic drawing of pituitary in left  
530 panels.

531 **Figure 7.** Schematic illustration showing differences in distribution of endocrine cell  
532 population between mid-sagittal and para-sagittal section of the medaka pituitary. The  
533 schemas are drawn based on mid- (A) and para-sagittal (B) point of view. C) Transverse  
534 view of medaka pituitary showing approximate location of mid-sagittal (red) and para-  
535 sagittal sections (green). Four direction arrows display the direction of the pituitary (A:  
536 anterior; P: posterior; D: dorsal; V: ventral).

537 **Supp. Fig. 1.** Density plots of hormone-encoding genes in the pituitary of adult male (A)  
538 and female (B) medaka. Red line represents a cut-off to differentiate between the cells with  
539 high gene expression (considered as endocrine cells) and low gene expression (considered  
540 as background and non-endocrine cells).

541 **Supp. Fig. 2-8.** Orthogonal view of each endocrine cell types in juvenile and adult male and  
542 female medaka. (2, *prl*; 3, *pomca*; 4, *tshba*; 5, *fshb*; 6, *lhb*; 7, *gh*; 8, *sl*). The pictures were  
543 captured from different perspectives: transverse (i), frontal (ii) and para-sagittal (iii). Up  
544 down arrow symbol shows the direction of the pituitary (A: anterior; P: posterior; D: dorsal;  
545 V: ventral).

546 **Supp. Fig. 9-13.** Transverse views of multi-color FISH of endocrine cells in juvenile and  
547 adult male and female medaka. (9, *prl-tshba-pomca*; 10, *sl-lhb-pomca*; 11, *fshb-tshba*; 12,  
548 *fshb-lhb*; 13, *fshb-gh*) (A: anterior; P: posterior; D: dorsal; V: ventral).

549 **Supp. Fig. 14.** The combination of FISH for *pomca* and IF for Acth or  $\alpha$ -Msh allows the  
550 distinction of two clear *pomca* expressing cell populations. The distinction of Acth (green)  
551 and  $\alpha$ -Msh (blue) producing cells from *pomca*-labelled (red) in the pituitary from juvenile  
552 male and female medaka. Dashed line represents the pituitary as shown in the right panel.  
553 Four direction arrows display the direction of the pituitary (A: anterior; P: posterior; D:  
554 dorsal; V: ventral).

555 **Table 1.** Primer sequences used for the mRNA level analysis in the medaka pituitary.

556 **Table 2.** Primer sequences used to make the *in situ* hybridization (ISH) probes of seven  
557 endocrine cell types in the medaka pituitary.

558 **Table 3.** Primary and secondary antibodies used for immunofluorescence (IF) to distinguish  
559 Acth and  $\alpha$ -Msh cells from *pomca*-expressing cells in the medaka pituitary.

560

## 561 **References**

- 562 1. Yeung C-M, Chan C-B, Leung P-S, Cheng CHK. Cells of the anterior pituitary. The  
563 International Journal of Biochemistry & Cell Biology. 2006;38(9):1441-9.
- 564 2. Ooi GT, Tawadros N, Escalona RM. Pituitary cell lines and their endocrine applications.  
565 Molecular and Cellular Endocrinology. 2004;228(1):1-21.
- 566 3. Melmed S. The pituitary: Academic press; 2010.
- 567 4. Brinkmeier ML, Davis SW, Carninci P, MacDonald JW, Kawai J, Ghosh D, et al. Discovery of  
568 transcriptional regulators and signaling pathways in the developing pituitary gland by  
569 bioinformatic and genomic approaches. Genomics. 2009;93(5):449-60.
- 570 5. Le Tissier PR, Hodson DJ, Lafont C, Fontanaud P, Schaeffer M, Mollard P. Anterior pituitary  
571 cell networks. Frontiers in Neuroendocrinology. 2012;33(3):252-66.
- 572 6. Kaneko T. Cell Biology of Somatolactin. In: Jeon KW, editor. International Review of  
573 Cytology. 169: Academic Press; 1996. p. 1-24.

- 574 7. Weltzien F-A, Hildahl J, Hodne K, Okubo K, Haug TM. Embryonic development of  
575 gonadotrope cells and gonadotropic hormones – Lessons from model fish. *Molecular and Cellular*  
576 *Endocrinology*. 2014;385(1):18-27.
- 577 8. Hernández MPGa, García Ayala A, Zandbergen MA, Agulleiro B. Investigation into the  
578 duality of gonadotropic cells of Mediterranean yellowtail (*Seriola dumerilii*, Risso 1810):  
579 immunocytochemical and ultrastructural studies. *General and Comparative Endocrinology*.  
580 2002;128(1):25-35.
- 581 9. Fontaine R, Ager-Wick E, Hodne K, Weltzien F-A. Plasticity in medaka gonadotropes via  
582 cell proliferation and phenotypic conversion. *Journal of Endocrinology*. 2020;245(1):21.
- 583 10. Candelma M, Fontaine R, Colella S, Santojanni A, Weltzien F-A, Carnevali O. Gonadotropin  
584 characterization, localization and expression in the European hake (*Merluccius merluccius*).  
585 *Reproduction*. 2017;153(2):123.
- 586 11. Golan M, Biran J, Levavi-Sivan B. A Novel Model for Development, Organization, and  
587 Function of Gonadotropes in Fish Pituitary. *Frontiers in Endocrinology*. 2014;5(182).
- 588 12. Schreibman MP, Leatherland JF, McKeown BA. Functional Morphology of the Teleost  
589 Pituitary Gland. *American Zoologist*. 2015;13(3):719-42.
- 590 13. Honji RM, Nóbrega RH, Pandolfi M, Shimizu A, Borella MI, Moreira RG.  
591 Immunohistochemical study of pituitary cells in wild and captive *Salminus hilarii* (Characiformes:  
592 Characidae) females during the annual reproductive cycle. *SpringerPlus*. 2013;2(1):460.
- 593 14. Aoki K, Umeura H. Cell Types in the Pituitary of the Medaka (*Oryzias latipes*).  
594 *Endocrinologia Japonica*. 1970;17(1):45-55.
- 595 15. Mukai T, Oota Y. Histological Changes in the Pituitary, Thyroid Gland and Gonads of the  
596 Fourspine Sculpin (*Cottus kazika*) during Downstream Migration. *Zoological Science*.  
597 1995;12(1):91-7.
- 598 16. Camacho LR, Pozzi AG, de Freitas EG, Shimizu A, Pandolfi M. Morphological and  
599 immunohistochemical comparison of the pituitary gland between a tropical *Paracheirodon*  
600 *axelrodi* and a subtropical *Aphyocharax anisitsi* characids (Characiformes: Characidae) %J  
601 *Neotropical Ichthyology*. 2020;18.
- 602 17. Sánchez Cala F, Portillo A, Martín del Río MP, Mancera JM. Immunocytochemical  
603 characterization of adenohypophyseal cells in the greater weever fish (*Trachinus draco*). *Tissue*  
604 *and Cell*. 2003;35(3):169-78.
- 605 18. Segura-Noguera MM, Laíz-Carrión R, Martín del Río MP, Mancera JM. An  
606 Immunocytochemical Study of the Pituitary Gland of the White Seabream (*Diplodus Sargus*). *The*  
607 *Histochemical Journal*. 2000;32(12):733-42.
- 608 19. Pandolfi M, Cánepa MM, Meijide FJ, Alonso F, Vázquez GR, Maggese MC, et al. Studies on  
609 the reproductive and developmental biology of *Cichlasoma dimerus* (Perciformes, Cichlidae).  
610 *Biocell*. 2009;33(1):1-18.
- 611 20. Weltzien F-A, Norberg B, Helvik JV, Andersen Ø, Swanson P, Andersson E. Identification  
612 and localization of eight distinct hormone-producing cell types in the pituitary of male Atlantic  
613 halibut (*Hippoglossus hippoglossus* L.). *Comparative Biochemistry and Physiology Part A:*  
614 *Molecular & Integrative Physiology*. 2003;134(2):315-27.
- 615 21. Kasper RS, Shved N, Takahashi A, Reinecke M, Eppler E. A systematic  
616 immunohistochemical survey of the distribution patterns of GH, prolactin, somatolactin,  $\beta$ -TSH,  
617  $\beta$ -FSH,  $\beta$ -LH, ACTH, and  $\alpha$ -MSH in the adenohypophysis of *Oreochromis niloticus*, the Nile tilapia.  
618 *Cell and Tissue Research*. 2006;325(2):303-13.
- 619 22. Parhar IS, Nagahama Y, Grau EG, Ross RM. Immunocytochemical and Ultrastructural  
620 Identification of Pituitary Cell Types in the Protogynous *Thalassoma duperrey* during Adult Sexual Ontogeny. 1998;15 %J *Zoological Science*(2):263-76, 14.
- 621 23. Childs GV. Development of gonadotropes may involve cyclic transdifferentiation of  
622 growth hormone cells. *Archives of physiology and biochemistry*. 2002;110(1-2):42-9.
- 623

- 624 24. Childs GV. Multipotential pituitary cells that contain adrenocorticotropin (ACTH) and  
625 other pituitary hormones. *Trends in Endocrinology & Metabolism*. 1991;2(3):112-7.
- 626 25. Frawley LS, Boockfor FR. Mammosomatotropes: Presence and Functions in Normal and  
627 Neoplastic Pituitary Tissue. *Endocrine Reviews*. 1991;12(4):337-55.
- 628 26. Fukami K, Tasaka K, Mizuki J, Kasahara K, Masumoto N, Miyake A, et al. Bihormonal Cells  
629 Secreting Both Prolactin and Gonadotropins in Normal Rat Pituitary Cells. *Endocrine Journal*.  
630 1997;44(6):819-26.
- 631 27. Ben-Shlomo A, Melmed S. Chapter 2 - Hypothalamic Regulation of Anterior Pituitary  
632 Function. In: Melmed S, editor. *The Pituitary (Third Edition)*. San Diego: Academic Press; 2011. p.  
633 21-45.
- 634 28. Fontaine R, Ciani E, Haug TM, Hodne K, Ager-Wick E, Baker DM, et al. Gonadotrope  
635 plasticity at cellular, population and structural levels: A comparison between fishes and  
636 mammals. *General and Comparative Endocrinology*. 2020;287:113344.
- 637 29. Wittbrodt J, Shima A, Schartl M. Medaka — a model organism from the far east. *Nature*  
638 *Reviews Genetics*. 2002;3(1):53-64.
- 639 30. Naruse K. Genetics, Genomics, and Biological Resources in the Medaka, *Oryzias latipes*. In:  
640 Naruse K, Tanaka M, Takeda H, editors. *Medaka: A Model for Organogenesis, Human Disease, and*  
641 *Evolution*. Tokyo: Springer Japan; 2011. p. 19-37.
- 642 31. Siddique K, Ager-Wick E, Fontaine R, Weltzien F-A, Henkel CV. Characterization of  
643 hormone-producing cell types in the medaka pituitary gland using single-cell RNA-seq. *bioRxiv*.  
644 2020.
- 645 32. Kenji Murata, Masato Kinoshita, Kiyoshi Naruse, Minoru Tanaka, Kamei Y. Looking at  
646 Adult Medaka. In: Kenji Murata, Masato Kinoshita, Kiyoshi Naruse, Minoru Tanaka, Kamei Y,  
647 editors. *Medaka: Biology, Management, and Experimental Protocols. 2: John Wiley & Sons; 2019.*  
648 p. 49-95.
- 649 33. Burow S, Fontaine R, von Krogh K, Mayer I, Nourizadeh-Lillabadi R, Hollander-Cohen L, et  
650 al. Medaka follicle-stimulating hormone (Fsh) and luteinizing hormone (Lh): Developmental  
651 profiles of pituitary protein and gene expression levels. *General and Comparative Endocrinology*.  
652 2019;272:93-108.
- 653 34. Fontaine R, Affaticati P, Yamamoto K, Jolly C, Bureau C, Baloché S, et al. Dopamine Inhibits  
654 Reproduction in Female Zebrafish (*Danio rerio*) via Three Pituitary D2 Receptor Subtypes.  
655 *Endocrinology*. 2013;154(2):807-18.
- 656 35. Fontaine R, Weltzien F-A. Labeling of Blood Vessels in the Teleost Brain and Pituitary  
657 Using Cardiac Perfusion with a Dil-fixative. *Journal of Visualized Experiments*. 2019(148):e59768.
- 658 36. Bjerke IE, Øvsthus M, Papp EA, Yates SC, Silvestri L, Fiorilli J, et al. Data integration  
659 through brain atlasing: Human Brain Project tools and strategies. *European Psychiatry*.  
660 2018;50:70-6.
- 661 37. Yates SC, Groeneboom NE, Coello C, Lichtenthaler SF, Kuhn P-H, Demuth H-U, et al.  
662 QUINT: Workflow for Quantification and Spatial Analysis of Features in Histological Images From  
663 Rodent Brain. *Frontiers in Neuroinformatics*. 2019;13(75).
- 664 38. Chapman SC, Sawitzke AL, Campbell DS, Schoenwolf GC. A three-dimensional atlas of  
665 pituitary gland development in the zebrafish. *Journal of Comparative Neurology*.  
666 2005;487(4):428-40.
- 667 39. Farbridge KJ, McDonald-Jones G, McLean CL, Lowry PJ, Etches RJ, Leatherland JF. The  
668 development of monoclonal antibodies against salmon (*Oncorhynchus kisutch* and *O. keta*)  
669 pituitary hormones and their immunohistochemical identification. *General and Comparative*  
670 *Endocrinology*. 1990;79(3):361-74.
- 671 40. Naito N, Takahashi A, Nakai Y, Kawauchi H, Hirano T. Immunocytochemical identification  
672 of the prolactin-secreting cells in the teleost pituitary with an antiserum to chum salmon  
673 prolactin. *General and Comparative Endocrinology*. 1983;50(2):282-91.

- 674 41. Wagner GF, McKeown BA. The immunocytochemical localization of pituitary somatotrops  
675 in the genus *Oncorhynchus* using an antiserum to growth hormone of chum salmon  
676 (*Oncorhynchus keta*). *Cell Tissue Res.* 1983;231(3):693-7.
- 677 42. Cambré ML, Verdonck W, Ollevier F, Vandesande F, Batten TFC, Kühn ER.  
678 Immunocytochemical identification and localization of the different cell types in the pituitary of  
679 the seabass (*Dicentrarchus labrax*). *General and Comparative Endocrinology.* 1986;61(3):368-75.
- 680 43. Quesada J, Lozano MT, Ortega A, Agulleiro B. Immunocytochemical and ultrastructural  
681 characterization of the cell types in the adenohypophysis of *Sparus aurata* L. (Teleost). *General*  
682 *and Comparative Endocrinology.* 1988;72(2):209-25.
- 683 44. Toubreau G, Poilve A, Baras E, Nonclercq D, De Moor S, Beckers JF, et al.  
684 Immunocytochemical study of cell type distribution in the pituitary of *Barbus barbus* (Teleostei,  
685 Cyprinidae). *General and Comparative Endocrinology.* 1991;83(1):35-47.
- 686 45. Huang L, Specker JL. Growth Hormone- and Prolactin-Producing Cells in the Pituitary  
687 Gland of Striped Bass (*Morone saxatilis*): Immunocytochemical Characterization at Different Life  
688 Stages. *General and Comparative Endocrinology.* 1994;94(2):225-36.
- 689 46. Borella MI, Venturieri R, Mancera JM. Immunocytochemical identification of  
690 adenohypophyseal cells in the pirarucu (*Arapaima gigas*), an Amazonian basal teleost. *Fish*  
691 *Physiology and Biochemistry.* 2009;35(1):3-16.
- 692 47. Olivereau M, Nagahama Y. Immunocytochemistry of gonadotropic cells in the pituitary of  
693 some teleost species. *General and Comparative Endocrinology.* 1983;50(2):252-60.
- 694 48. Dubourg P, Burzawa-Gerard E, Chambolle P, Kah O. Light and electron microscopic  
695 identification of gonadotrophic cells in the pituitary gland of the goldfish by means of  
696 immunocytochemistry. *General and Comparative Endocrinology.* 1985;59(3):472-81.
- 697 49. Nozaki M, Naito N, Swanson P, Miyata K, Nakai Y, Oota Y, et al. Salmonid pituitary  
698 gonadotrophs I. Distinct cellular distributions of two gonadotropins, GTH I and GTH II. *General*  
699 *and Comparative Endocrinology.* 1990;77(3):348-57.
- 700 50. Grandi G, Colombo G, Chicca M. Immunocytochemical studies on the pituitary gland of  
701 *Anguilla anguilla* L., in relation to early growth stages and diet-induced sex differentiation.  
702 *General and Comparative Endocrinology.* 2003;131(1):66-76.
- 703 51. García-Hernández MP, García-Ayala A, Elbal MT, Agulleiro B. The adenohypophysis of  
704 Mediterranean yellowtail, *Seriola dumerilii* (Risso, 1810): an immunocytochemical study. *Tissue*  
705 *and Cell.* 1996;28(5):577-85.
- 706 52. Grandi G, Chicca M. Early development of the pituitary gland in *Acipenser naccarii*  
707 (*Chondrostei, Acipenseriformes*): an immunocytochemical study. *Anatomy and Embryology.*  
708 2004;208(4):311-21.
- 709 53. Batten TFC. Immunocytochemical demonstration of pituitary cell types in the teleost  
710 *Poecilia latipinna*, by light and electron microscopy. *General and Comparative Endocrinology.*  
711 1986;63(1):139-54.
- 712 54. Gutnick A, Blechman J, Kaslin J, Herwig L, Belting H-G, Affolter M, et al. The Hypothalamic  
713 Neuropeptide Oxytocin Is Required for Formation of the Neurovascular Interface of the Pituitary.  
714 *Developmental Cell.* 2011;21(4):642-54.
- 715 55. Golan M, Zelinger E, Zohar Y, Levavi-Sivan B. Architecture of GnRH-Gonadotrope-  
716 Vasculature Reveals a Dual Mode of Gonadotropin Regulation in Fish. *Endocrinology.*  
717 2015;156(11):4163-73.
- 718 56. Kawabata-Sakata Y, Nishiike Y, Fleming T, Kikuchi Y, Okubo K. Androgen-dependent sexual  
719 dimorphism in pituitary tryptophan hydroxylase expression: relevance to sex differences in  
720 pituitary hormones. *Proceedings of the Royal Society B: Biological Sciences.*  
721 2020;287(1928):20200713.
- 722 57. Taranger GL, Carrillo M, Schulz RW, Fontaine P, Zanuy S, Felip A, et al. Control of puberty  
723 in farmed fish. *General and Comparative Endocrinology.* 2010;165(3):483-515.

- 724 58. Borg B. Androgens in teleost fishes. *Comparative Biochemistry and Physiology Part C:*  
725 *Pharmacology, Toxicology and Endocrinology.* 1994;109(3):219-45.
- 726 59. Royan MR, Kanda S, Kayo D, Song W, Ge W, Weltzien F-A, et al. Gonadectomy and Blood  
727 Sampling Procedures in the Small Size Teleost Model Japanese Medaka (*Oryzias latipes*). *JoVE.*  
728 2020(166):e62006.
- 729 60. Ohta K, Mine T, Yamaguchi A, Matsuyama M. Sexually dimorphic expression of pituitary  
730 glycoprotein hormones in a sex-changing fish (*Pseudolabrus sieboldi*). *Journal of Experimental*  
731 *Zoology Part A: Ecological Genetics and Physiology.* 2008;309A(9):534-41.
- 732 61. Martin SAM, Wallner W, Youngson AF, Smith T. Differential expression of Atlantic salmon  
733 thyrotropin  $\beta$  subunit mRNA and its cDNA sequence. *Journal of Fish Biology.* 1999;54(4):757-66.
- 734 62. He W, Dai X, Chen X, He J, Yin Z. Zebrafish pituitary gene expression before and after  
735 sexual maturation. *Journal of Endocrinology.* 2014;221(3):429.
- 736 63. Fontaine R, Ager-Wick E, Hodne K, Weltzien F-A. Plasticity of Lh cells caused by cell  
737 proliferation and recruitment of existing cells. *Journal of Endocrinology.* 2019;240(2):361.
- 738 64. Rand-Weaver M, Swanson P, Kawachi H, Dickhoff WW. Somatolactin, a novel pituitary  
739 protein: purification and plasma levels during reproductive maturation of coho salmon. *Journal of*  
740 *Endocrinology.* 1992;133(3):393.
- 741 65. Mousa MA, Mousa SA. Immunocytochemical Study on the Localization and Distribution of  
742 the Somatolactin Cells in the Pituitary Gland and the Brain of *Oreochromis niloticus* (Teleostei,  
743 Cichlidae). *General and Comparative Endocrinology.* 1999;113(2):197-211.
- 744 66. Mousa MA, Mousa SA. Implication of somatolactin in the regulation of sexual maturation  
745 and spawning of *Mugil cephalus*. *Journal of Experimental Zoology.* 2000;287(1):62-73.
- 746 67. Benedet S, Björnsson BT, Taranger GL, Andersson E. Cloning of somatolactin alpha, beta  
747 forms and the somatolactin receptor in Atlantic salmon: seasonal expression profile in pituitary  
748 and ovary of maturing female broodstock. *Reproductive biology and endocrinology.* 2008;6:42-.
- 749 68. Onuma T, Kitahashi T, Taniyama S, Saito D, Ando H, Urano A. Changes in expression of  
750 genes encoding gonadotropin subunits and growth hormone/prolactin/somatolactin family  
751 hormones during final maturation and freshwater adaptation in prespawning chum salmon.  
752 *Endocrine.* 2003;20(1):23-33.
- 753 69. Fontaine R, Royan MR, von Krogh K, Weltzien F-A, Baker DM. Direct and Indirect Effects of  
754 Sex Steroids on Gonadotrope Cell Plasticity in the Teleost Fish Pituitary. *Frontiers in*  
755 *Endocrinology.* 2020;11(858).
- 756 70. Childs GV, MacNicol AM, MacNicol MC. Molecular Mechanisms of Pituitary Cell Plasticity.  
757 *Frontiers in Endocrinology.* 2020;11(656).
- 758 71. Rizzoti K. Adult pituitary progenitors/stem cells: from in vitro characterization to in vivo  
759 function. 2010;32(12):2053-62.
- 760 72. Ho Y, Hu P, Peel MT, Chen S, Camara PG, Epstein DJ, et al. Single-cell transcriptomic  
761 analysis of adult mouse pituitary reveals sexual dimorphism and physiologic demand-induced  
762 cellular plasticity. *Protein & Cell.* 2020;11(8):565-83.
- 763 73. Fabian P, Tseng KC, Smeeton J, Lancman JJ, Dong PDS, Cerny R, et al. Lineage analysis  
764 reveals an endodermal contribution to the vertebrate pituitary. *Science.* 2020;370(6515):463-7.
- 765 74. Batten T, Ball JN, Benjamin M. Ultrastructure of the adenohypophysis in the teleost  
766 *Poecilia latipinna*. *Cell and Tissue Research.* 1975;161(2):239-61.
- 767 75. Margolis-Kazan H, Peute J, Schreibman MP, Halpern LR. Ultrastructural localization of  
768 gonadotropin and luteinizing hormone releasing hormone in the pituitary gland of a teleost fish  
769 (the platyfish). *Journal of Experimental Zoology.* 1981;215(1):99-102.
- 770 76. Yan HY, Thomas P. Histochemical and immunocytochemical identification of the pituitary  
771 cell types in three sciaenid fishes: Atlantic croaker (*Micropogonias undulatus*), spotted seatrout  
772 (*Cynoscion nebulosus*), and red drum (*Sciaenops ocellatus*). *General and Comparative*  
773 *Endocrinology.* 1991;84(3):389-400.

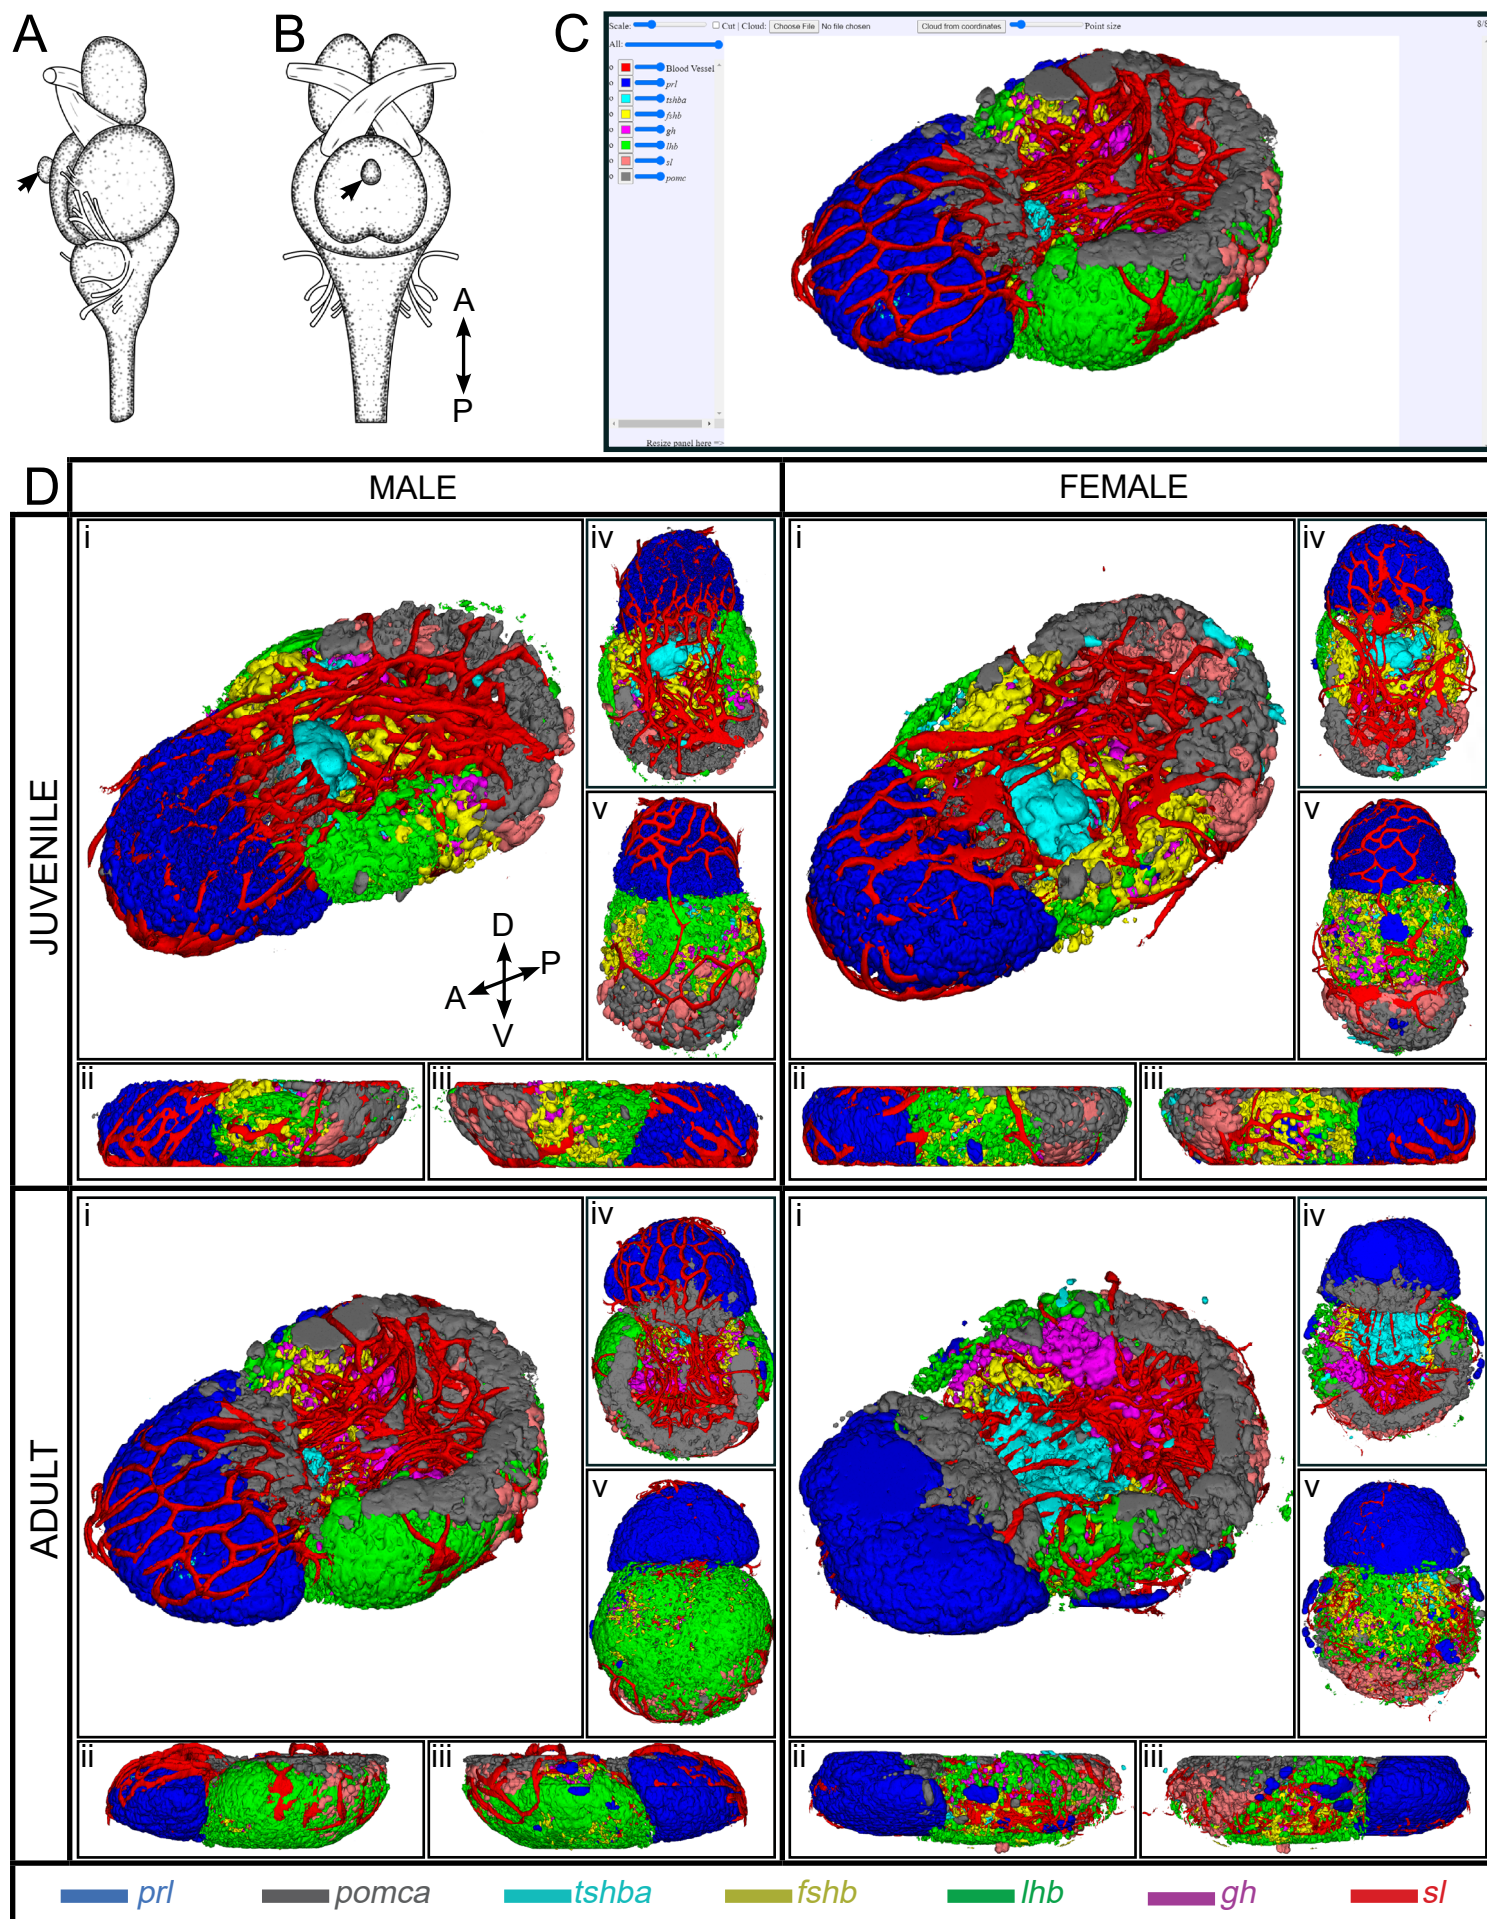

FIGURE 1

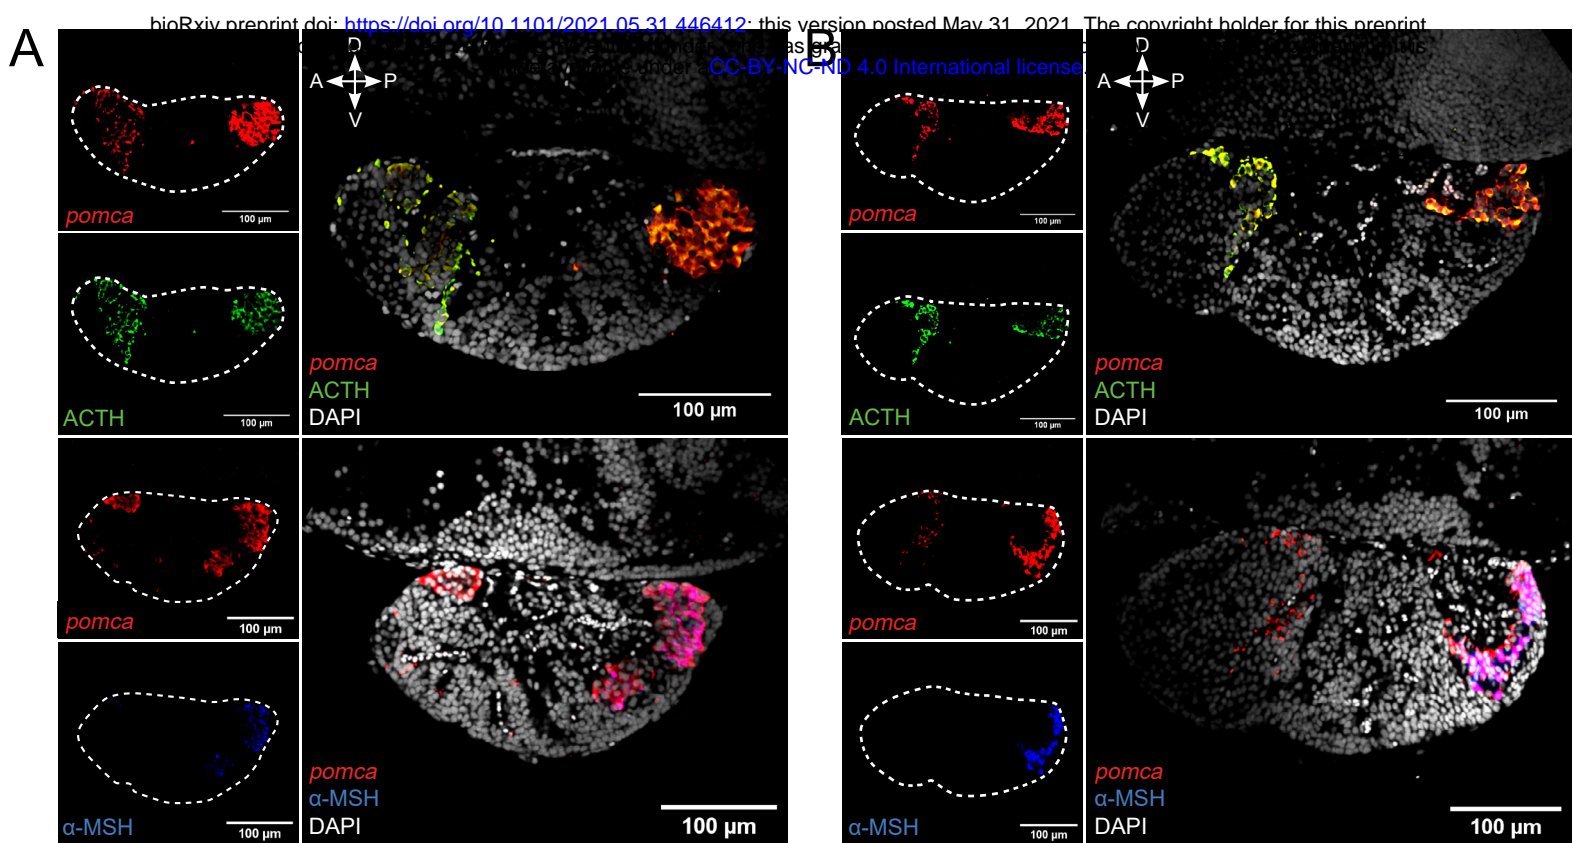

FIGURE 2



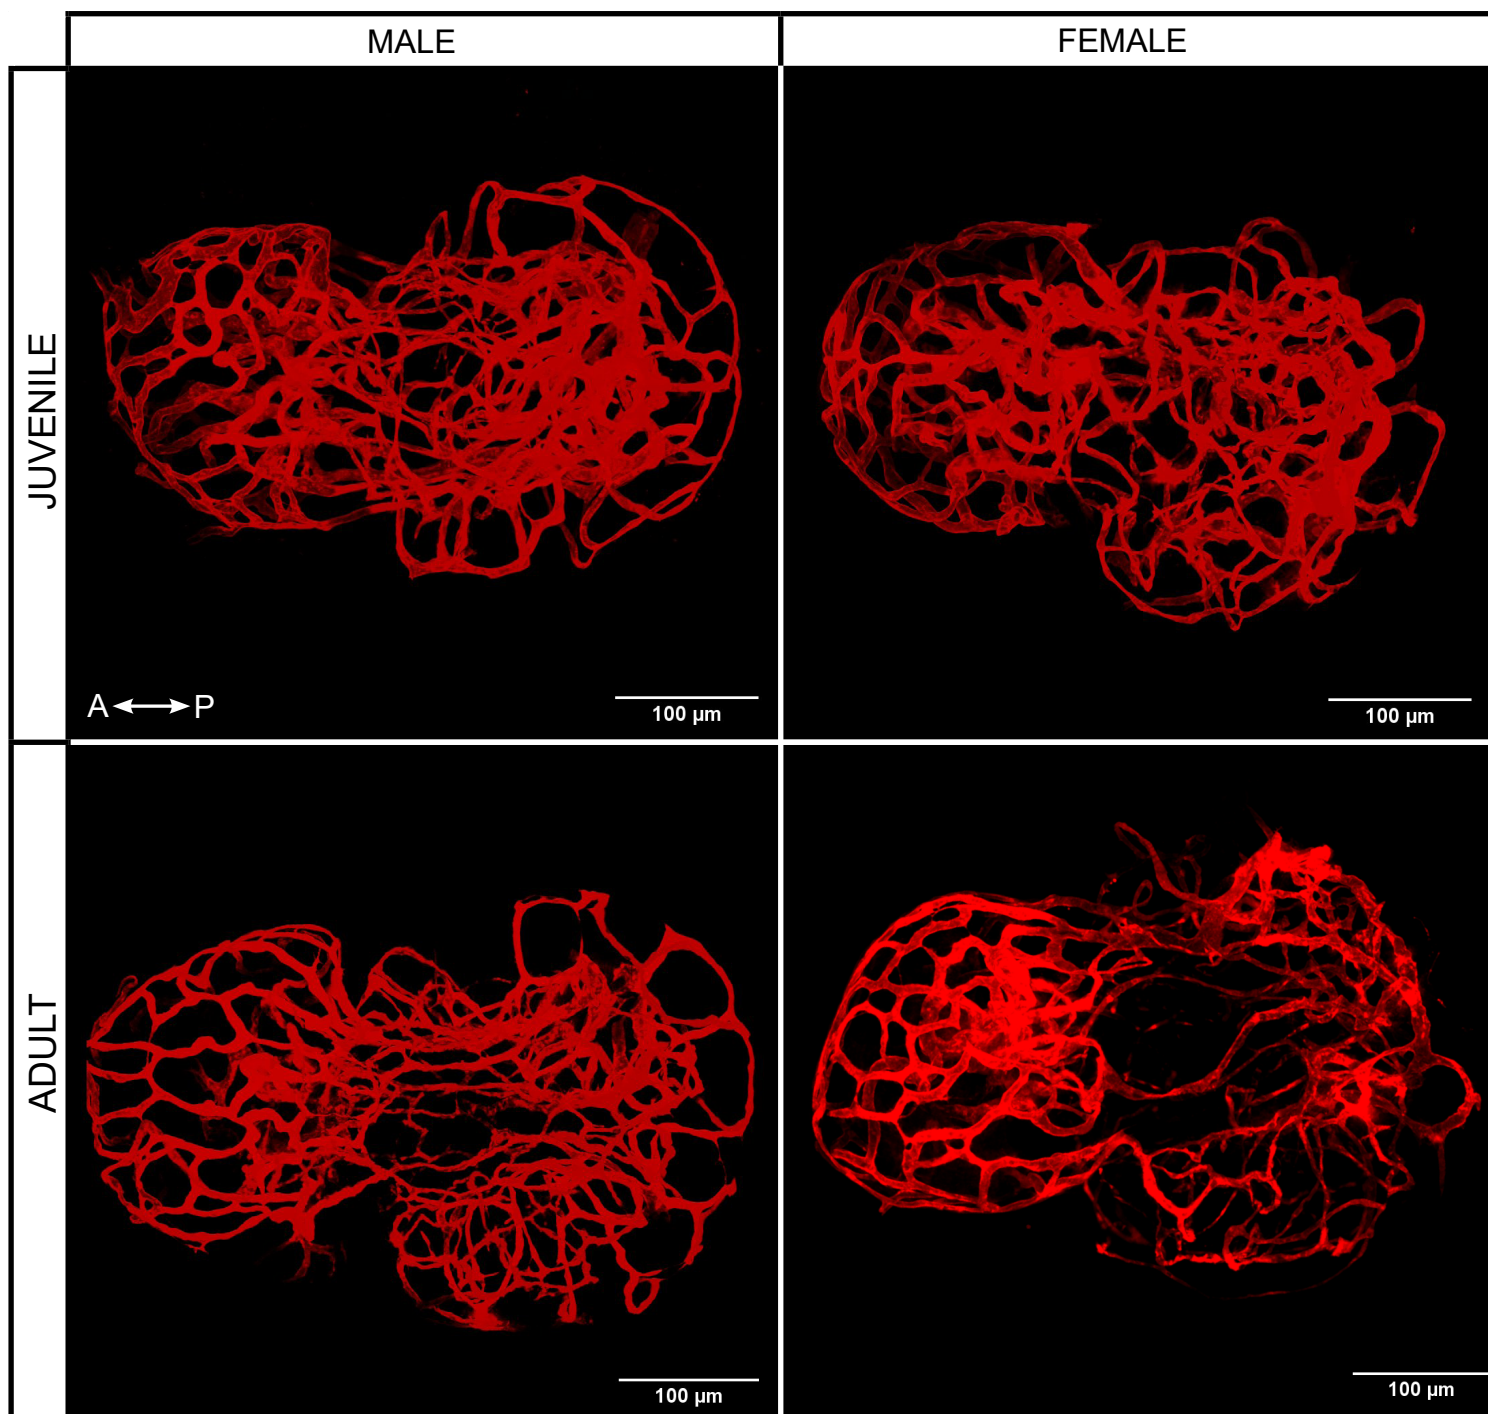

FIGURE 3

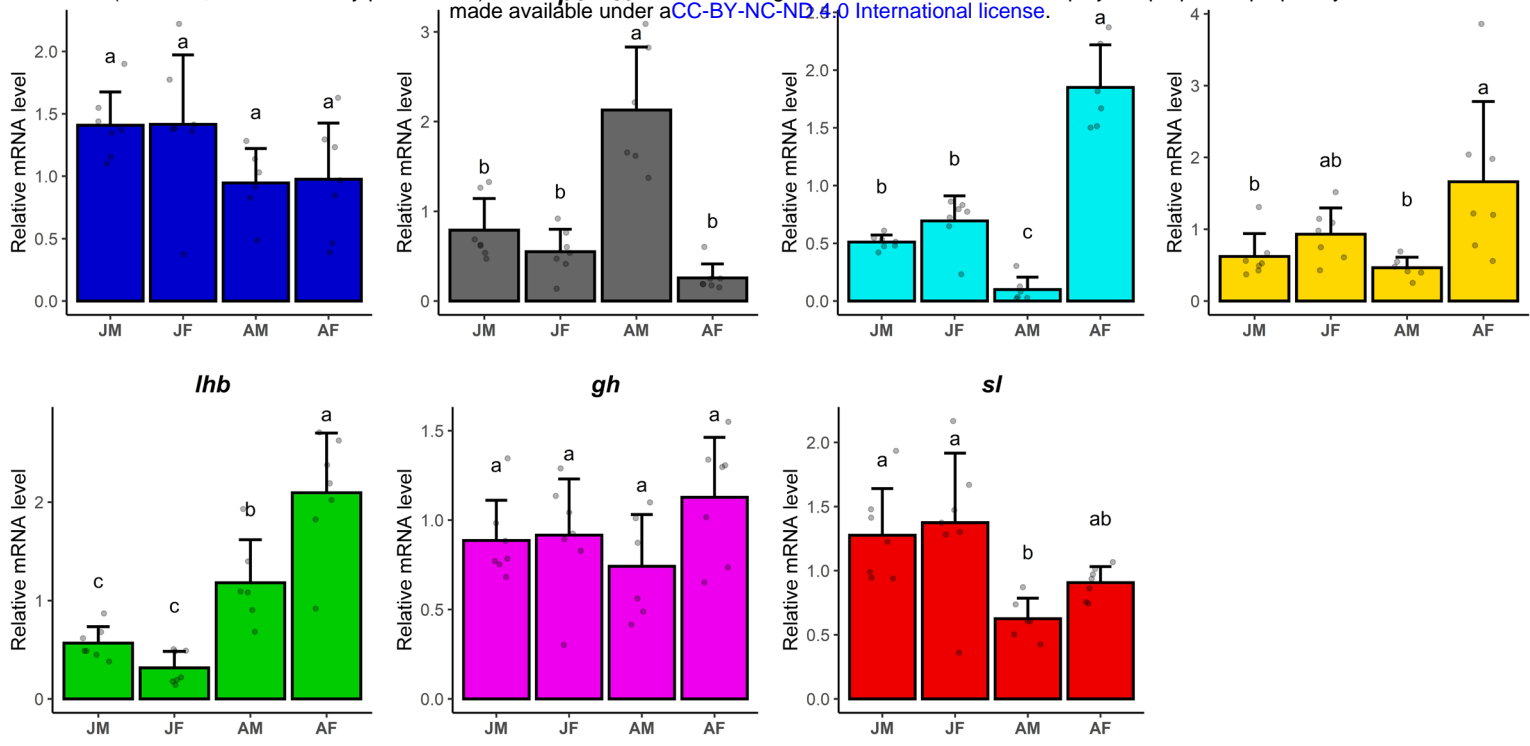

FIGURE 4

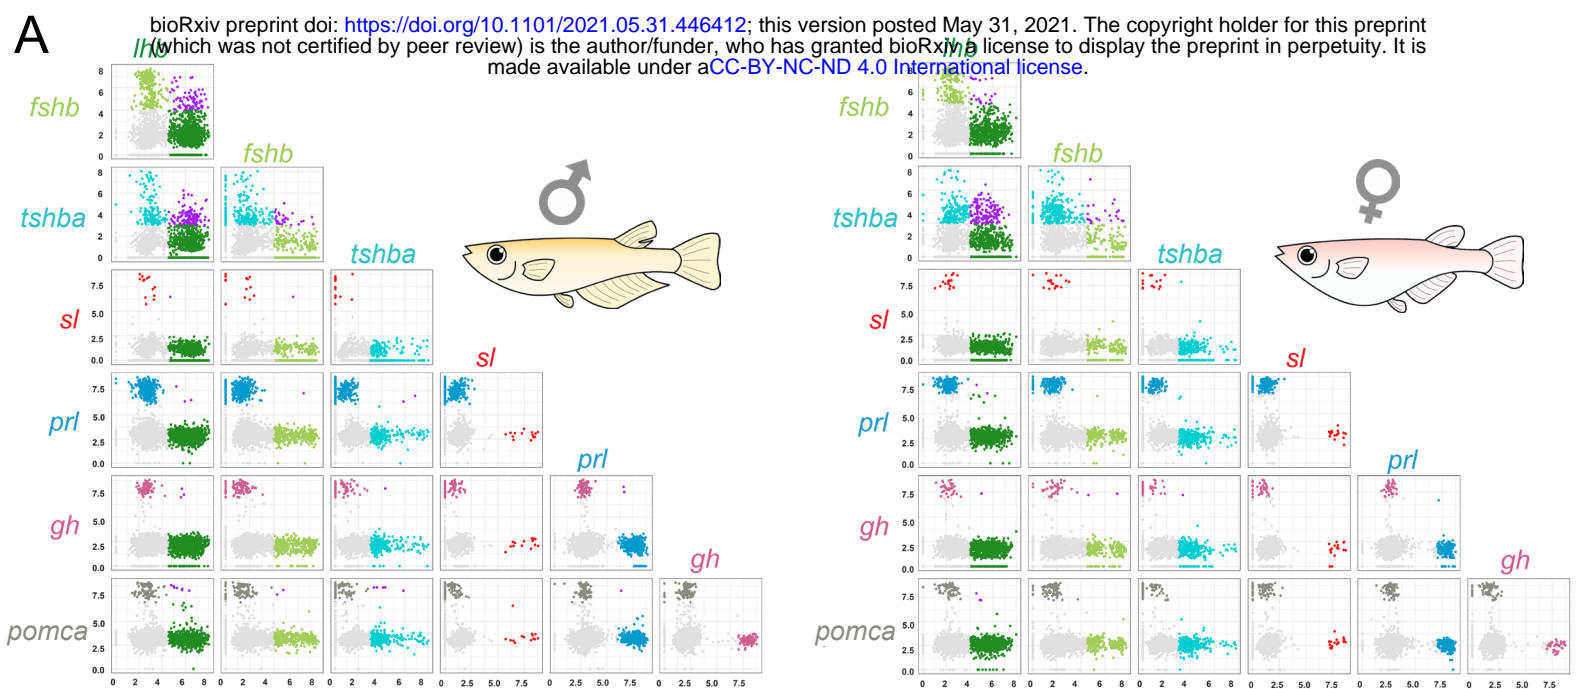

**B**

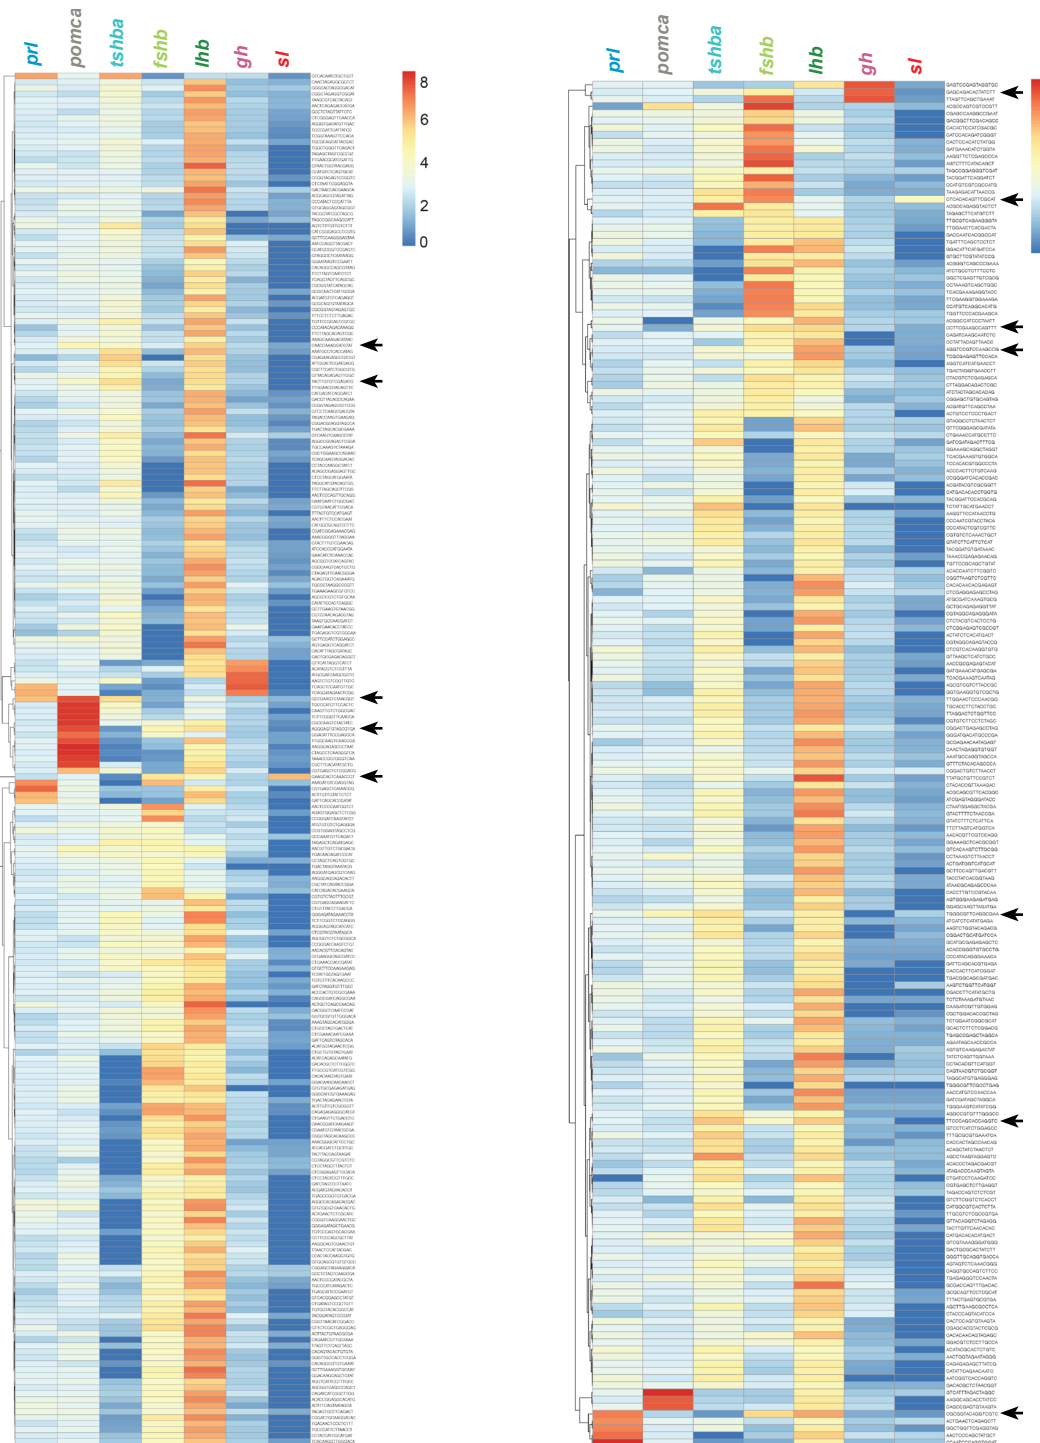

**FIGURE 5**

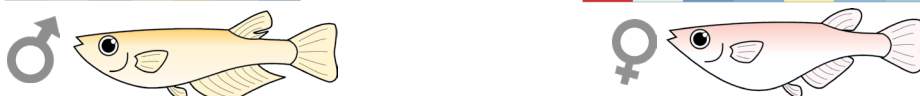

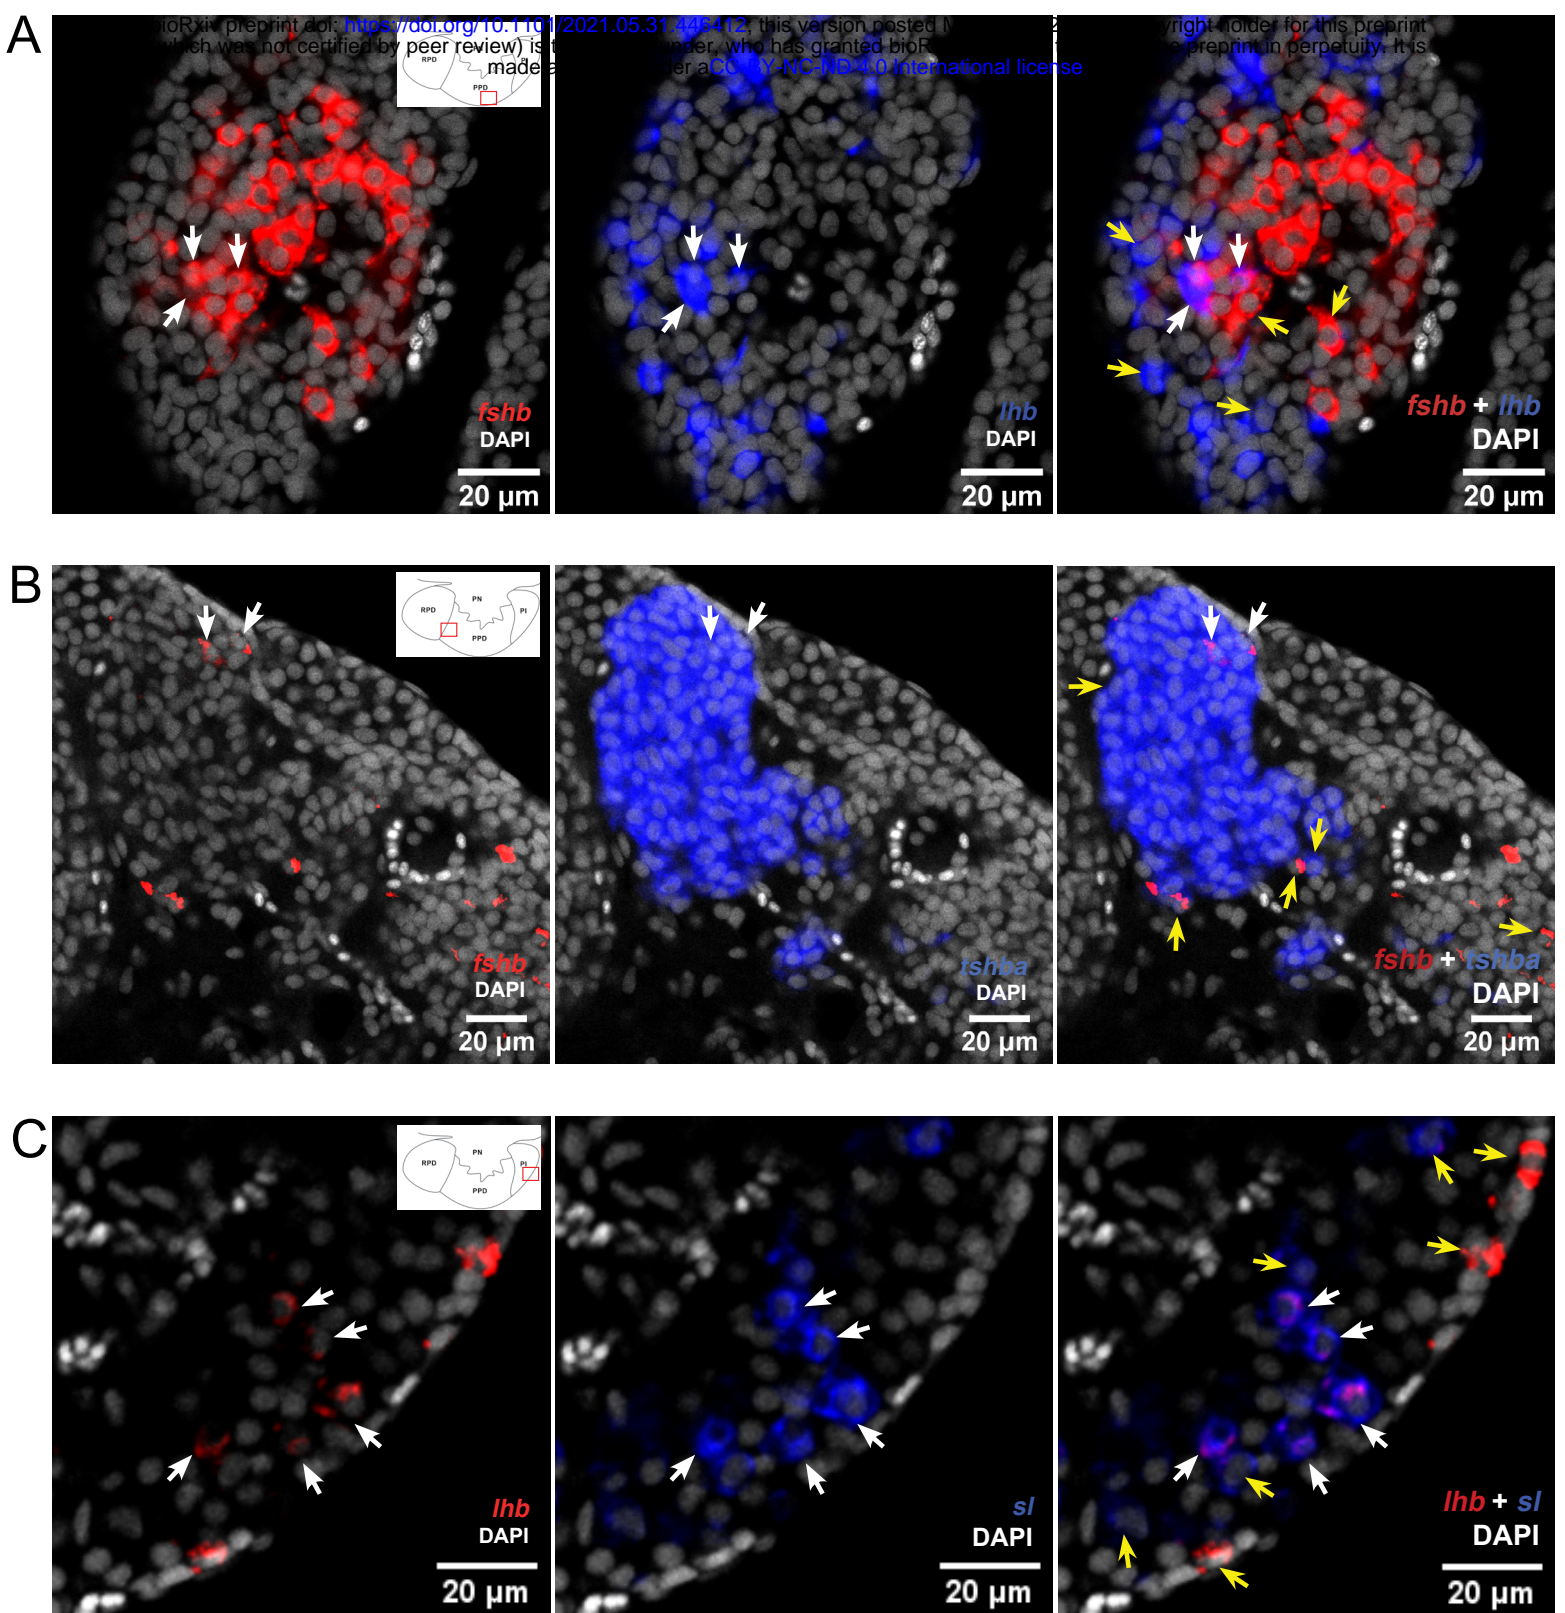

FIGURE 6

A

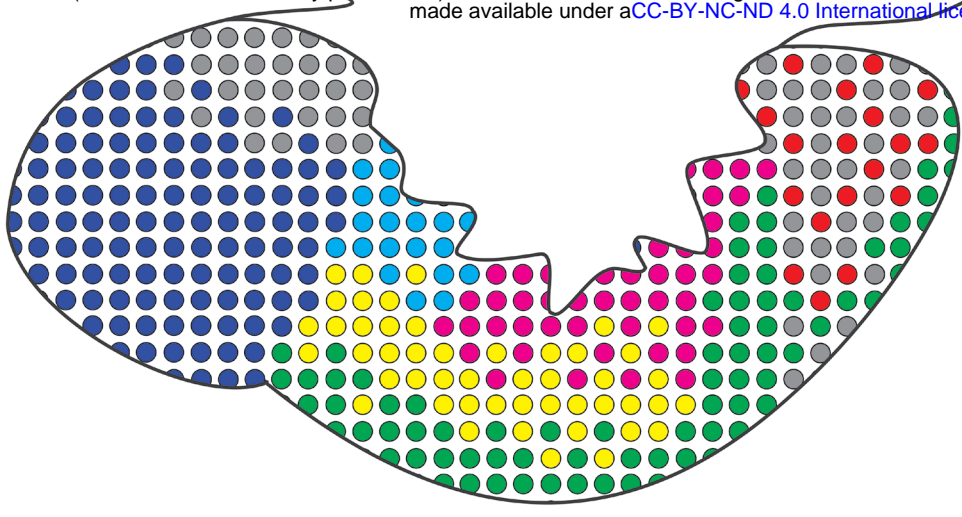

B

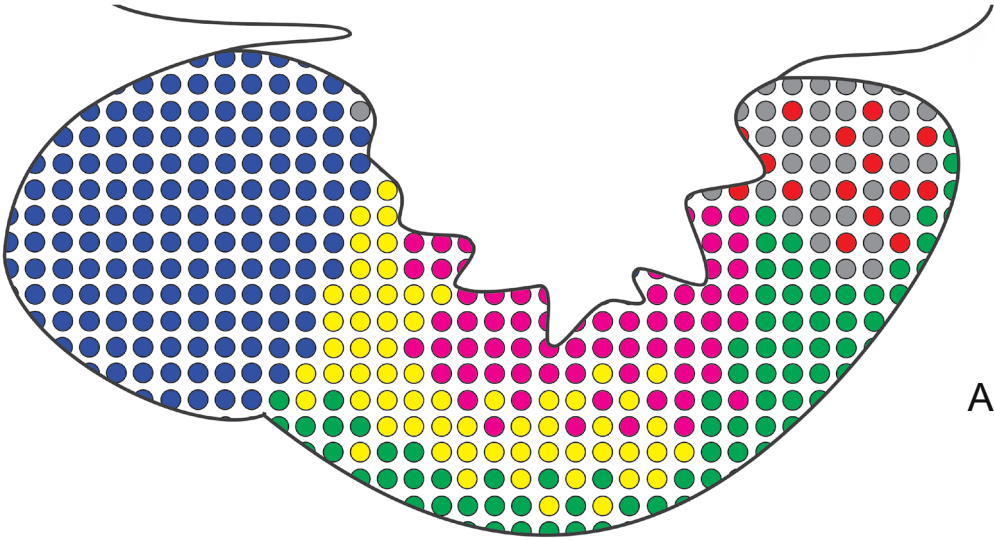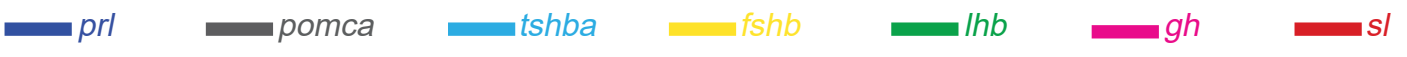

C

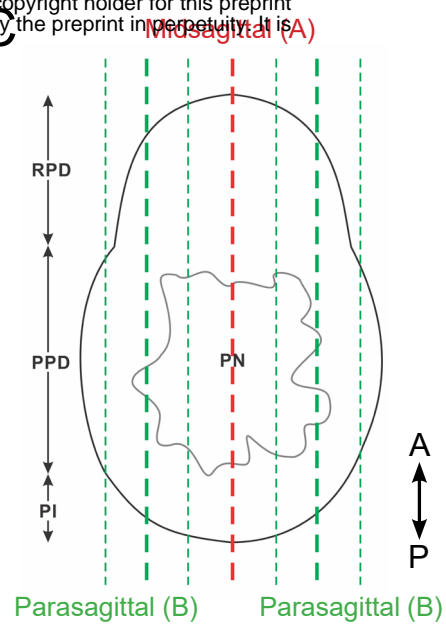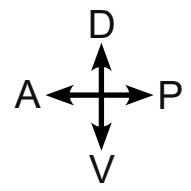

FIGURE 7

| Gene Name    | Sequence (5' - 3')        | Ensembl Gene Name | Accession Number (NCBI/Ensembl) | Amplicon size (bp) | Efficiency | Reference              |
|--------------|---------------------------|-------------------|---------------------------------|--------------------|------------|------------------------|
| <i>rpl7</i>  | F: TGCTTTGGTGGAGAAAGCTC   | <i>rpl7</i>       | NM_001104870                    | 98                 | 2.03       | (Burow et al., 2019)   |
|              | R: TGGCAGGCTTGAAGTTCTTT   |                   | ENSORLG00000007967              |                    |            |                        |
| <i>prl</i>   | F: TCAGATGGGAACCAGAGGAC   | <i>prl1</i>       | XM_004071867.4                  | 85                 | 1.987      | This study             |
|              | R: GATGTCCACGGCTTTACACA   |                   | ENSORLG00000016928              |                    |            |                        |
| <i>tshba</i> | F: ATGTGGAGAAGCCAGAATGC   | <i>tshba</i>      | XM_004068796.4                  | 88                 | 2          | This study             |
|              | R: CTCATGTTGCTGTCCCTTGA   |                   | ENSORLG00000029251              |                    |            |                        |
| <i>lhb</i>   | F: CCACTGCCTTACCAAGGACC   | <i>lhb</i>        | NM_001137653.2                  | 100                | 2          | (Hildahl et al., 2012) |
|              | R: AGGAAGCTCAAATGTCTTGTAG |                   | ENSORLG00000003553              |                    |            |                        |
| <i>fshb</i>  | F: GACGGTGCTACCATGAGGAT   | <i>fshb</i>       | NM_001309017.1                  | 73                 | 2.03       | (Burow et al., 2019)   |
|              | R: TCCCCACTGCAGATCTTTTC   |                   | ENSORLG00000029237              |                    |            |                        |
| <i>gh</i>    | F: TCGCTCTTTGTCTGGGAGTT   | <i>gh1</i>        | XM_004084500.3                  | 102                | 1.94       | This study             |
|              | R: ACATTCTGATTGGCCCTGAT   |                   | ENSORLG00000019556              |                    |            |                        |
| <i>pomca</i> | F: GTGGTGGTTGTCGGTGGG     | <i>pomca</i>      | XM_004066456.3                  | 122                | 1.956      | This study             |
|              | R: GTGAGGTCAGAGCGGCAG     |                   | ENSORLG00000025908              |                    |            |                        |
| <i>sl</i>    | F: CACCAAAGCATTACCCATCC   | <i>smtla</i>      | NM_001104790.1                  | 87                 | 1.965      | This study             |
|              | R: ACCAGCATCAGCACAGAATG   |                   | ENSORLG00000013460              |                    |            |                        |

TABLE 1

| Gene         | Sequence (5' - 3')          | Ensembl gene name | Accession Number (NCBI/Ensembl) | PCR product size (bp) | Reference             |
|--------------|-----------------------------|-------------------|---------------------------------|-----------------------|-----------------------|
| <i>lhb</i>   | F: CACAGCCTGCAGATACATGAG    | <i>lhb</i>        | NM_001137653.2                  | 318                   | Hildahl et al. (2012) |
|              | R: AGGAAGCTCAAATGTCTTGAG    |                   | ENSORLG00000003553              |                       |                       |
| <i>fshb</i>  | F: GAGGAAGCAACACTTTCAGC     | <i>fshb</i>       | NM_001309017.1                  | 500                   | Hodne et al (2019)    |
|              | R: GCACAGTTTCTTTATTTTCAGTGC |                   | ENSORLG000000029237             |                       |                       |
| <i>pomca</i> | F: ATGTATACCGTTTGGTTGCT     | <i>pomca</i>      | XM_004066456.3                  | 515                   | This study            |
|              | R: AAATGCTTCATCTTGAGGAG     |                   | ENSORLG000000025908             |                       |                       |
| <i>sl</i>    | F: CCCATCTTTTCACTGTAAGT     | <i>smtla</i>      | NM_001104790.1                  | 506                   | This study            |
|              | R: AACTGGAAGGCACCTTGTT      |                   | ENSORLG000000013460             |                       |                       |
| <i>prl</i>   | F: GAAAGACCGAGGAGGAACTG     | <i>prl1</i>       | XM_004071867.4                  | 381                   | This study            |
|              | R: TTGCAGAGTTGGACAGGACC     |                   | ENSORLG000000016928             |                       |                       |
| <i>gh</i>    | F: TCTCTGCAGACTGAGGAACA     | <i>gh1</i>        | XM_004084500.3                  | 501                   | This study            |
|              | R: AGCCACAGTCAGGTAGGTCT     |                   | ENSORLG000000019556             |                       |                       |
| <i>tshba</i> | F: ACAGGCTAAACTCAAGTTAA     | <i>tshba</i>      | XM_004068796.4                  | 473                   | This study            |
|              | R: AGGATCATATAGGTGCTCTG     |                   | ENSORLG000000029251             |                       |                       |

TABLE 2

| Antibody                                 | Dilution | Source              | Reference                |
|------------------------------------------|----------|---------------------|--------------------------|
| Rabbit anti-human ACTH antibody          | 1:1000   | abcam (ab74976)     | (Romanò et al., 2017)    |
| Rabbit anti-human $\alpha$ -MSH antibody | 1:3000   | abcam (ab123811)    | (Pravdivyi et al., 2015) |
| Goat anti-rabbit antibody (Alexa-555)    | 1:500    | Invitrogen (A21429) | (Hodne et al., 2019)     |

TABLE 3
